1 The evolution of knowledge on genes associated with human diseases

2

3 Thomaz Lüscher-Dias<sup>1</sup>, Rodrigo Juliani Siqueira Dalmolin<sup>2,3</sup>, Paulo de Paiva Amaral<sup>4</sup>, Tiago  
4 Lubiana Alves<sup>4</sup>, Viviane Schuch<sup>4</sup>, Glória Regina Franco<sup>1</sup>, Helder I Nakaya<sup>4,5,6\*</sup>.

5

6 <sup>1</sup> Department of Biochemistry and Immunology, Institute of Biological Sciences, Federal  
7 University of Minas Gerais, Belo Horizonte, MG, Brazil;

8 <sup>2</sup> Bioinformatics Multidisciplinary Environment—BioME, IMD, Federal University of Rio Grande  
9 do Norte, Natal, RN, Brazil;

10 <sup>3</sup> Department of Biochemistry, CB, Federal University of Rio Grande do Norte, Natal, RN, Brazil;

11 <sup>4</sup> Department of Clinical and Toxicological Analyses, School of Pharmaceutical Sciences,  
12 University of São Paulo, São Paulo, Brazil;

13 <sup>5</sup> Hospital Israelita Albert Einstein, São Paulo, Brazil.

14 <sup>6</sup> Scientific Platform Pasteur-University of São Paulo, São Paulo, Brazil

15

16 **\*Correspondence to:** [hnakaya@usp.br](mailto:hnakaya@usp.br)

17 **Abstract**

18 Thousands of scientific articles describing genes associated with human diseases are published  
19 every week. Computational methods such as text mining and machine learning algorithms are  
20 now able to automatically detect these associations. In this study, we used a cognitive  
21 computing text-mining application to construct a knowledge network comprised of 3,723 genes  
22 and 99 diseases. We then tracked the yearly changes on these networks to analyze how our  
23 knowledge has evolved in the past 30 years. Our approach helped to unravel the molecular  
24 bases of diseases over time, and to detect shared mechanisms between clinically distinct  
25 diseases. It also revealed that multi-purpose therapeutic drugs target genes which are  
26 commonly associated with several psychiatric, inflammatory, or infectious disorders. By  
27 navigating in this knowledge tsunami, we were able to extract relevant biological information  
28 and insights about human diseases.

29

30 **Keywords:** meta-research, evolution of knowledge, genes, human diseases, network analysis

## 31 Introduction

32 Thousands of scientific articles are published every day, piling up with millions of already  
33 published papers (Fortunato et al., 2018). Keeping abreast of scientific significance has become  
34 an overwhelming task for researchers in their own fields and in other areas of science. In this  
35 scenario, computational methods such as text mining, machine learning, and cognitive  
36 computing are helping scientists to summarize published scientific literature. Recently, machine  
37 learning approaches have been used to analyze and integrate a variety of biological and  
38 medical data (Littmann et al., 2020; Zitnik et al., 2019). These include methods that integrate  
39 electronic health records (Rajkomar et al., 2018), capture latent knowledge from the material  
40 science literature (Tshitoyan et al., 2019), and discover potential novel drugs to treat psychiatric  
41 and neurological disorders using cognitive computing and network medicine analysis of the  
42 medical literature (Lüscher Dias et al., 2020).

43 Particularly, the field of molecular biology has seen a remarkable increase in the number  
44 of new studies in recent decades. This has resulted in a large number of genes associated with  
45 diseases. As a positive consequence of this efflux of genetic knowledge, diseases that were  
46 previously not known to have common etiologies are now being connected through their shared  
47 alterations in gene expression and interaction patterns, which has opened many potential new  
48 roads for clinical advances (Brooks et al., 2014; Carson et al., 2017; Lees et al., 2011; Postma  
49 et al., 2011). One significant example of this trend is the association between psychiatric  
50 disorders and immune-related diseases (Gibney and Drexhage, 2013; Marrie et al., 2017; Wang  
51 et al., 2015).

52 Network medicine (Barabási et al., 2011), a contemporary approach to studying  
53 relationships between genes and diseases, has also been made possible because of the large

54 amounts of data on genes and diseases available online. Moreover, knowledge networks, that  
55 is, complex graphs that connect concepts according to the established knowledge, can be  
56 analyzed under the network medicine framework to produce novel insights from medical  
57 knowledge (Bai et al., 2016; Lüscher Dias et al., 2020).

58         In this study, we used IBM Watson for Drug Discovery (WDD; Y. Chen et al., 2016), a  
59 cognitive computing text-mining application, to extract known relationships between genes and  
60 psychiatric, inflammatory, and infectious diseases from the peer-reviewed literature published  
61 between 1990 and 2018. We developed knowledge networks of genes and diseases and  
62 monitored the evolution of these relationships yearly. We then quantified and described how  
63 genes were connected to each category of disease over this period and how key biological  
64 functions unraveled as new genes were added to the network. We also found pairs of diseases  
65 from different categories that significantly share genes with each other, indicating underlying  
66 clinical proximity between diseases that have not been historically related. Lastly, we explored  
67 the genes that were common to all psychiatric, inflammatory, or infectious diseases and  
68 investigated which drugs target them. By using a network medicine approach, we were able to  
69 extract relevant biological information and new insights of genes, pathways, and therapeutic  
70 drugs associated with complex human disorders.

## 71 **Results**

### 72 **Evolution of knowledge on the molecular bases of human diseases.**

73 We used WDD, a cognitive computing text-mining application, to identify connections  
74 between genes and diseases in millions of peer-reviewed studies (Y. Chen et al., 2016). For  
75 each year from 1990 to 2018, we queried WDD to obtain gene sets related to 99 inflammatory,  
76 psychiatric, and infectious diseases (Table S1). WDD detects terms of interest, such as genes  
77 and diseases, in scientific texts (e.g., PubMed abstracts and full text journal articles) and finds  
78 contextual elements connecting them (e.g., prepositions and verbs). These connections can be  
79 extracted from many distinct sources of evidence such as gene expression alterations, genome-  
80 wide association studies, or protein expression experiments. A confidence score is established  
81 for each relationship based on the strength of the detected semantic association and also the  
82 number of documents in which the connection is found. However, the type of study from which  
83 the association is obtained is not considered for the calculation of the evidence score. Here, we  
84 kept only gene-disease relationships with a confidence score equal or higher than 50%, and  
85 which were supported by at least 2 studies.

86 Next, we built yearly disease-disease networks connecting inflammatory, infectious, and  
87 psychiatric diseases according to the significance of the genes shared by each pair of diseases  
88 (Fig. 1A). These networks were cumulative: the 2018 network (Fig. 1A, rightmost network)  
89 displays all connections found in the entire period, while the 2000 network (Fig. 1A, second  
90 network from left to right), for instance, contains all connections from 1990 up to that year. The  
91 1990 network (Fig. 1A, leftmost network) depicts the relationships between diseases from the  
92 beginning of the literature registries up to 1990.

93

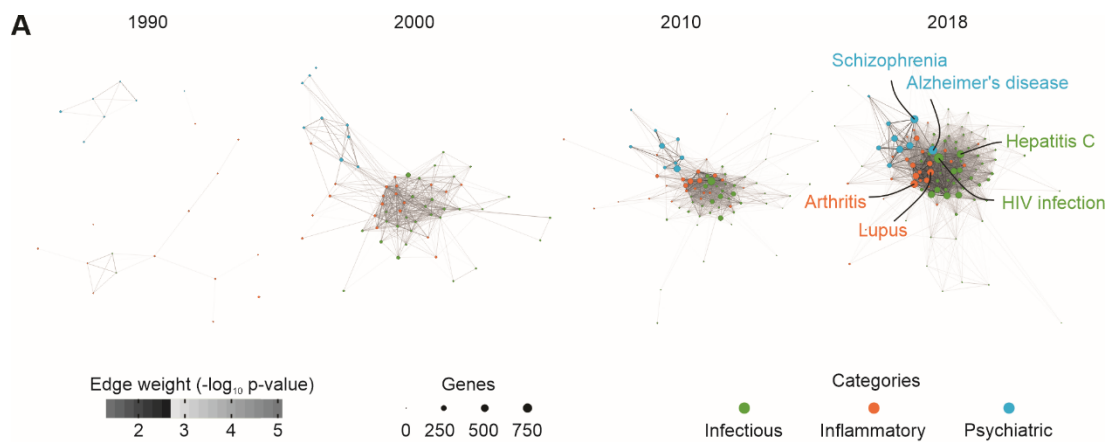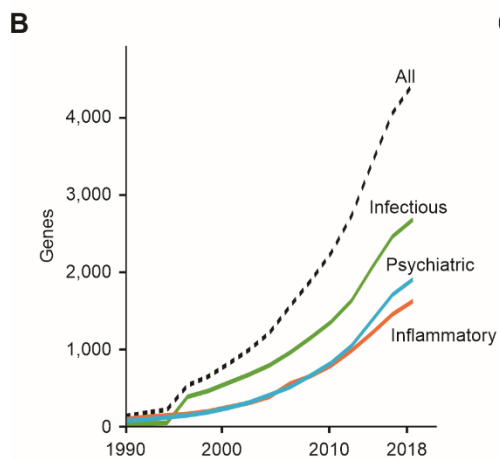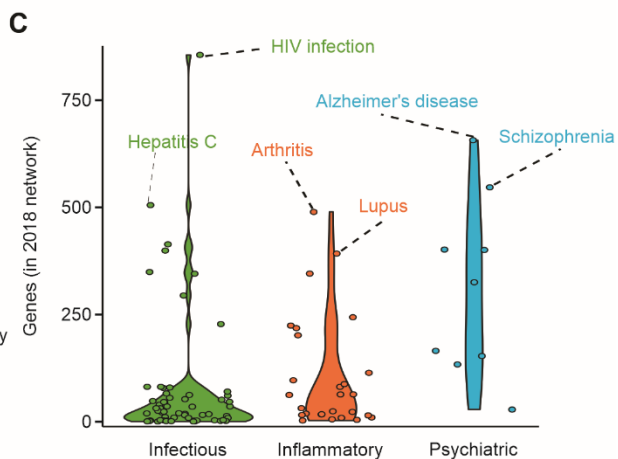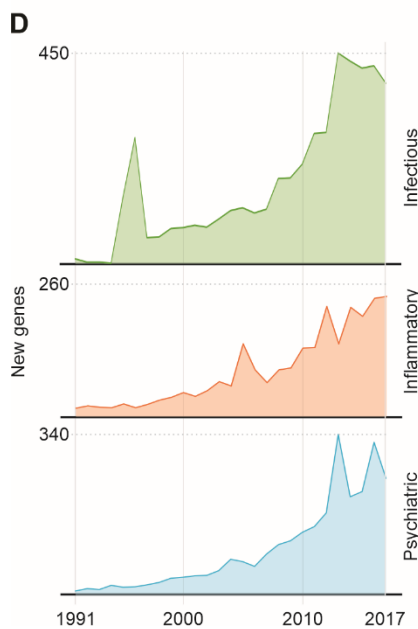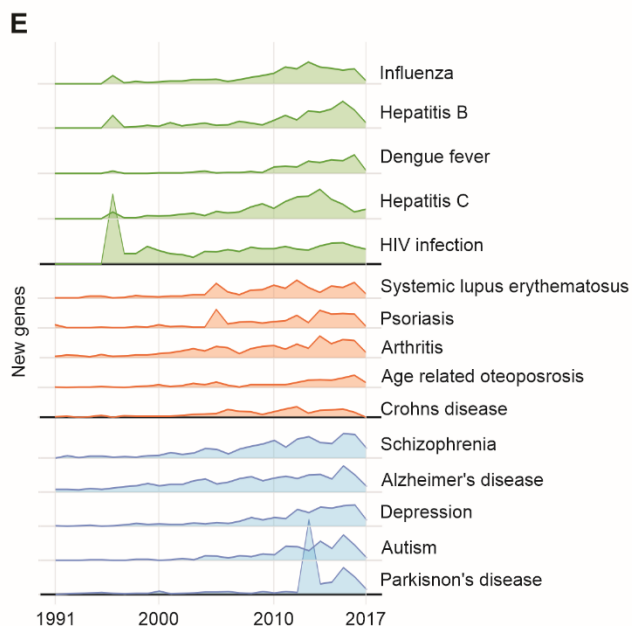

95 **Figure 1. Evolution of knowledge on the molecular bases of human diseases. A.** Disease-  
96 disease knowledge network on infectious, inflammatory, and psychiatric disorders from 1990 to  
97 2018. Nodes represent diseases and are proportional to the number of genes associated with  
98 each disease in each year. Edge weights are proportional to the significance of gene-sharing  
99 between each pair of diseases. Only edges with a p-value < 0.01 are depicted. **B.** Cumulative  
100 number of genes associated with each disease category and with all diseases from 1990 to  
101 2018. **C.** Distribution of the number of genes associated with each disease and category in  
102 2018. **D.** Number of new genes added to the network in each category per year. **E.** Number of  
103 new genes added to the network in selected diseases each year. **Color code:** Green –  
104 infectious diseases, orange – inflammatory diseases, and blue – psychiatric disorders.

105

106 We then assessed how these relationships evolved over the past three decades (1990–  
107 2018) and explored the historical trends of the new genes connected to the network during the  
108 period (Fig. 1B–E and Table S2). In 1990, only 95 genes were connected in the network (Fig.  
109 1B), and no association between psychiatric disorders and inflammatory or infectious diseases  
110 could be established through shared genes (Fig. 1A). Accordingly, the overall similarity between  
111 diseases (between or within categories) was low in 1990 (Fig. S1). From 1990 to 2010, with the  
112 constant increase in the number of genes associated with diseases in all categories, a  
113 preliminary approximation between inflammatory and infectious diseases was observed (Fig.  
114 1A, second panel, and Fig. S1A). During the next 9 years (2010 to 2018), the new genes added  
115 to the network (Fig. 1B) resulted in a strengthening of the connections between infectious and  
116 inflammatory diseases, and a fast approximation between psychiatric disorders and the other  
117 two categories (Fig. 1A, fourth panel, and Fig. S1A). Meanwhile, the proximity of diseases within

118 the same categories also increased (Fig. S1B). Inflammatory diseases occupy a central position  
119 in the 2018 network (Fig. 1A, fourth panel), which reflects their high between- and within-  
120 category similarities sustained throughout the 30-year period (Fig. S1). Psychiatric and  
121 infectious diseases presented the lowest similarity between each other (Figs. 1A and S1).

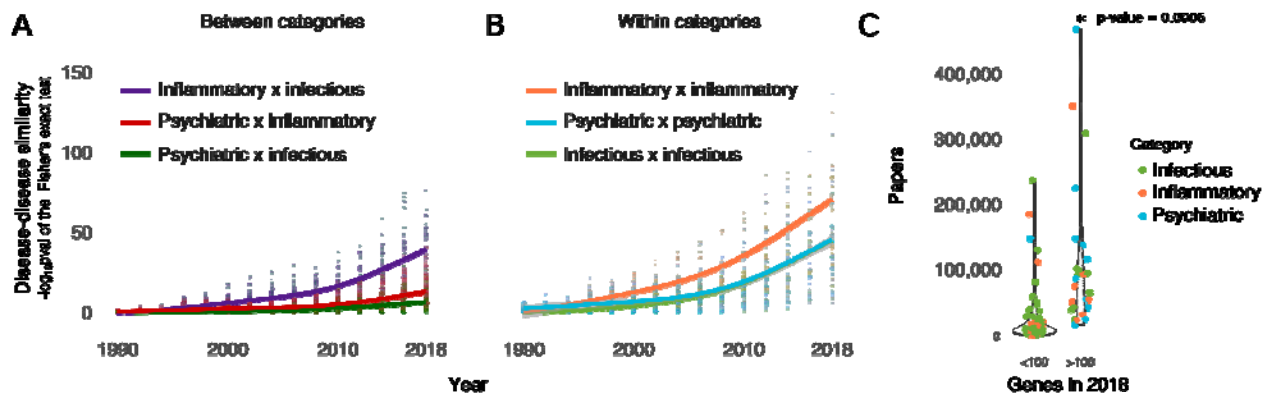

122

123

124 **Figure S1. Evolution of knowledge – supplementary results. A and B.** Evolution of the  
125 mean disease-disease similarity between diseases of different categories (A) or within diseases  
126 of the same categories (B). **C.** Comparison of the total number of papers retrieved from PubMed  
127 on diseases of all categories that were connected to less than 100 genes in the 2018 network  
128 with that connected to more than 100 genes in 2018. The  $p$ -value is obtained from the t-test of  
129 the mean comparison between the two distributions.

130

131 In 2018, a total of 3,723 genes were present in the network (Fig. 1B). The number of  
132 genes associated with each disease in the three different categories in 2018 also varied (Fig.  
133 1C). The infectious diseases with the highest number of connected genes in 2018 were hepatitis  
134 B (414 genes), hepatitis C (506 genes), and HIV infection (856 genes; Fig. 1C). However, 55 of



135 63 infectious diseases were connected to less than 100 genes in 2018 (Fig. 1C). The most  
136 connected inflammatory diseases were psoriasis (346 genes), systemic lupus erythematosus  
137 (393 genes), and arthritis (490 genes; Fig. 1C). In the category of psychiatric disorders,  
138 Alzheimer's disease was the most connected (657 genes), followed by schizophrenia (547  
139 genes) and depression (402 genes; Fig. 1B). The imbalance in the distribution of genes  
140 connected to infectious diseases likely reflects a bias in the research interest toward the  
141 discovery of genes related to diseases already connected to more genes. In fact, the 2018  
142 network showed that the number of scientific papers that mentioned poorly connected diseases  
143 (less than 100 genes) is significantly lower than the number of papers published on highly  
144 connected diseases (more than 100 genes) (Fig. S1C).

145         Distinct historical trends of discovery were seen for each disease category (Fig. 1D and  
146 Table S3). Prominent peaks of gene-association discovery occurred in 1996 for infectious  
147 diseases, in 2005 for inflammatory diseases, and in 2013 for psychiatric disorders (Fig. 1C).  
148 From 2010 to 2017, the rate of gene discovery in all three categories increased (Fig. 1C). The  
149 significant increase in the number of genes associated with infectious diseases observed in  
150 1996 was mostly driven by 154 new genes associated with HIV infection (Fig. 1D), which  
151 corresponded to 50% of the new genes added to the network in that year (Table S3). The triple  
152 therapy for HIV using nucleoside reverse-transcriptase inhibitors and protease inhibitors was  
153 established in 1996 (Hammer et al., 1996), which likely influenced this outburst of genetic  
154 discovery. The 2005 increase in the number of genes associated with inflammatory diseases  
155 was mostly related to the new genes connected to psoriasis (41 genes) and systemic lupus  
156 erythematosus (33 genes; Fig. 1D), which together corresponded to 20% of the new genes  
157 associated with all of the diseases in 2005 (Table S3). The Th<sub>17</sub> cell lineage was discovered in

158 2005 (Langrish et al., 2005), a cell type that has since been strongly associated with  
159 autoimmune and infectious diseases (Zambrano-Zaragoza et al., 2014). In 2013, a large  
160 number of new genes were associated with Parkinson's disease (165 genes Fig. 1D), which  
161 corresponded to 17% of the new genes in the network in that year (Table S3). We could not  
162 detect any specific scientific landmark in 2013 that could explain this peak. Nevertheless,  
163 important genes related to the innate immune response to pathogens and inflammation are  
164 among the new genes associated with Parkinson's disease in 2013, such as interleukin 1 beta  
165 (IL1B) and the p105 subunit of the nuclear factor kappa B (NFKB1).

166

#### 167 **Evolution of disease relationships between categories**

168         Next, we investigated the evolution of the similarity between diseases from different  
169 categories according to their shared genes (see Methods section). For the top 9 most  
170 connected diseases of each category in 2018 (i.e., diseases connected to more genes), we  
171 detected the diseases from the other two categories with the most significant gene sharing  
172 between them and analyzed how these relationships evolved from 1990 to 2018 (Figs. 2, S2,  
173 S3, and S4). Alzheimer's disease was the psychiatric disorder with the highest similarity to  
174 inflammatory diseases in 2018, including arthritis and systemic lupus erythematosus (Fig. 2A).  
175 The relationships between Alzheimer's disease and these disorders grew steadily in  
176 significance from 1990 to 2018 (Fig. S2A), which captures the now well-established relevance of  
177 inflammatory processes in the pathophysiology of Alzheimer's disease (Newcombe et al., 2018).  
178 Surprisingly, fibromyalgia was similar to several psychiatric diseases: depression, anxiety,  
179 bipolar disorder, schizophrenia, and Huntington's disease (Figs. 2A and S2). The total number  
180 of genes associated with fibromyalgia in 2018 was low (25 genes), but 72% of these (17 genes)

181 are also associated with depression. These are genes related to nervous system development,  
182 such as brain derived neurotrophic factor (BDNF), nerve growth factor (NGF), and neuropeptide  
183 Y (NPY), and inflammatory response, including interleukin 6 (IL6), C-X-C motif chemokine  
184 ligand 8 (CXCL8), and tumor necrosis factor (TNF). In fact, fibromyalgia patients often present  
185 psychiatric comorbidities such as depression and anxiety (Galvez-Sánchez et al., 2020).

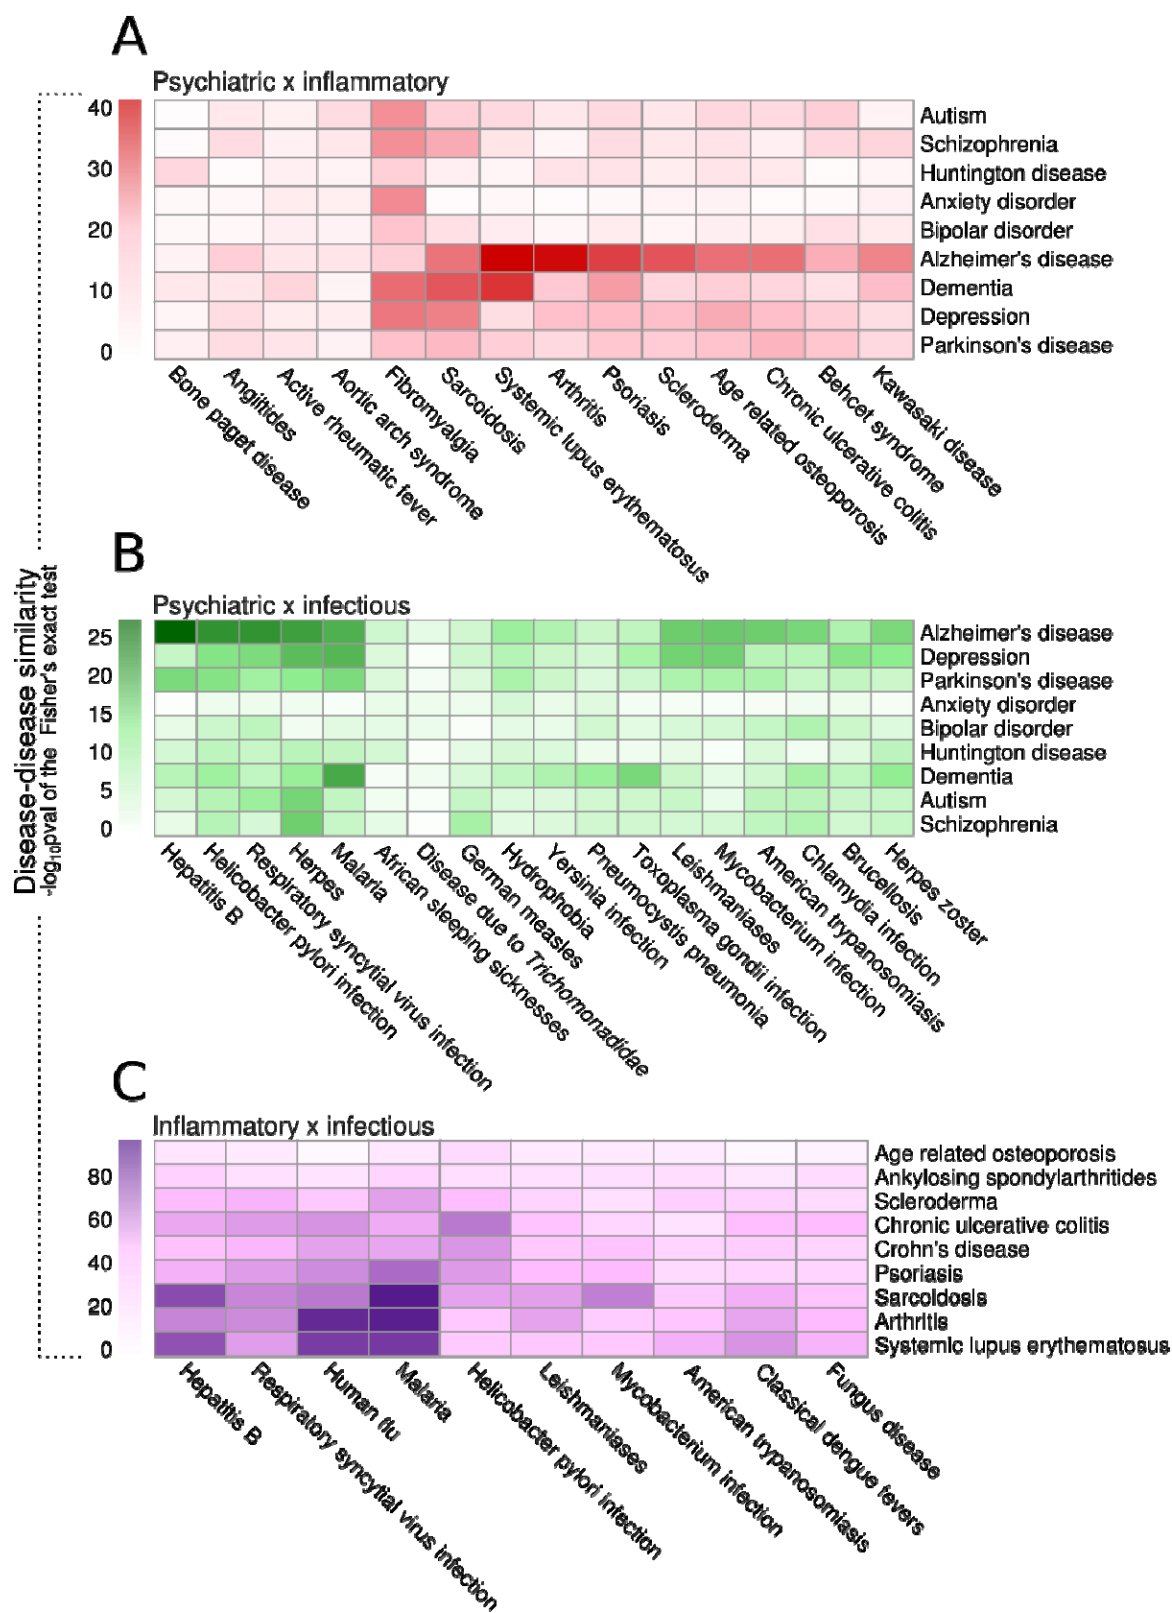

187 **Figure 2. Evolution of disease relationships between categories. A.** Disease-disease  
188 similarity between diseases of different categories in the 2018 network according to their shared  
189 genes. The similarity score was defined as the  $-\log_{10}pval$  of the Fisher's exact test result of the  
190 gene overlap between each disease pair. Each heatmap represents the similarity score  
191 between diseases of two different categories: **A.** psychiatric versus inflammatory diseases. **B.**  
192 psychiatric versus infectious diseases. **C.** inflammatory versus infectious diseases.

193

194 Among infectious diseases, herpes was the most similar disease to autism,  
195 schizophrenia, and Huntington's disease and was also among the top 5 most similar infectious  
196 diseases to depression, Parkinson's disease, and Alzheimer's disease (Figs. 2B and S3).  
197 Herpes infection might be associated with the development of Alzheimer's disease (Harris and  
198 Harris, 2015); the typical amyloid- $\beta$  deposition that occurs in the brain of Alzheimer's disease  
199 patients could be an innate immunity mechanism to fight herpes virus infections (Eimer et al.,  
200 2018). Our results indicate that there has been latent evidence of that association since the  
201 early 2000s in the scientific literature (Fig. S3A). In the 2005 network, Alzheimer's disease and  
202 herpes virus infection shared 14 genes, which represented 58% of the known genes associated  
203 with herpes infection at that time.

204

## Psychiatric vs. inflammatory

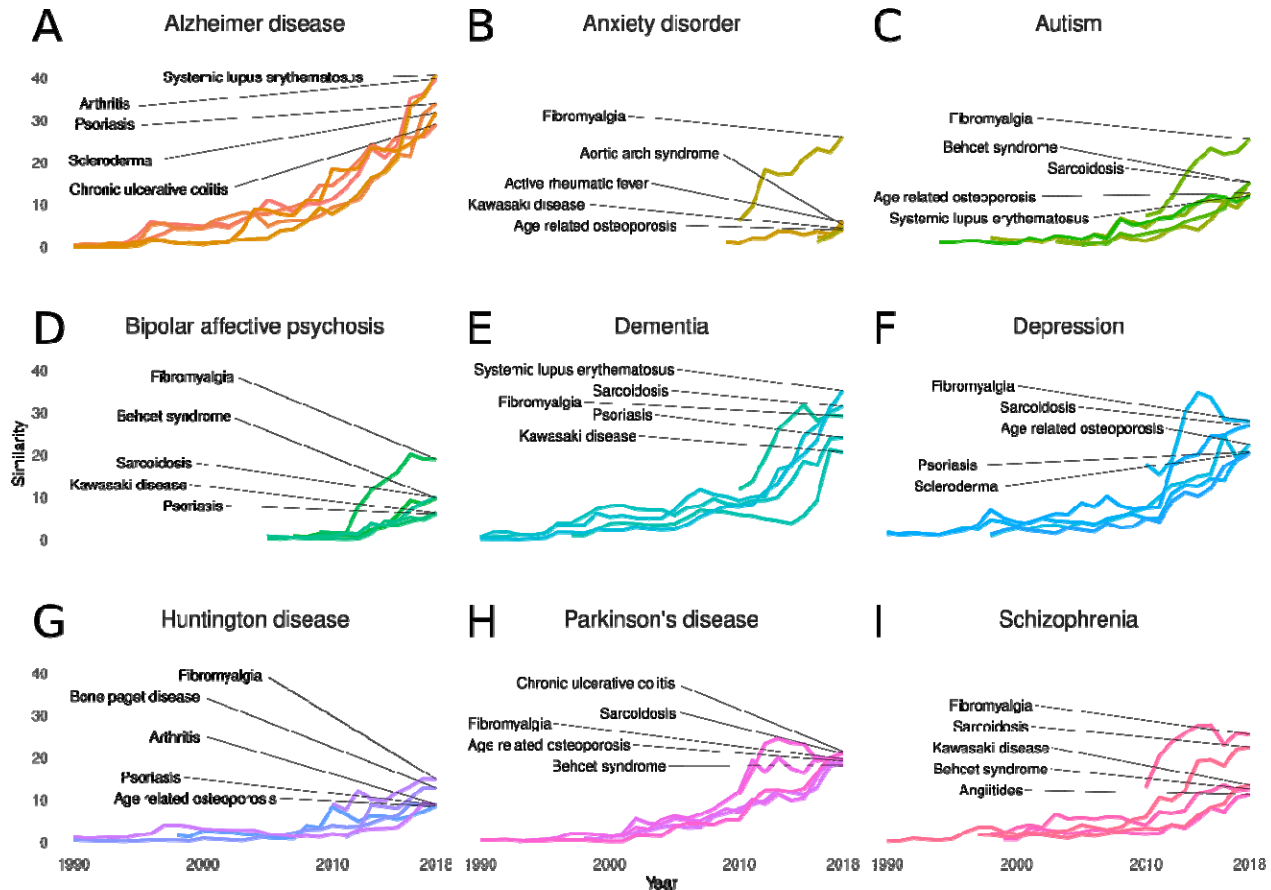

205

206

207 **Figure S2. Disease-disease similarity evolution between psychiatric and inflammatory**

208 **diseases from 1990 to 2018. A–I.** Evolution of the similarity between psychiatric disorders and

209 inflammatory diseases: Alzheimer's disease (A), anxiety disorder (B), autism (C), bipolar

210 disorder (D), dementia (E), depression (F), Huntington's disease (G), Parkinson's disease (H),

211 and schizophrenia (I). Similarity scores represent the  $-\log_{10}p$ val of the Fisher's exact test result

212 of the gene overlap between each disease pair in each year from 1990 to 2018.

## Psychiatric vs. infectious

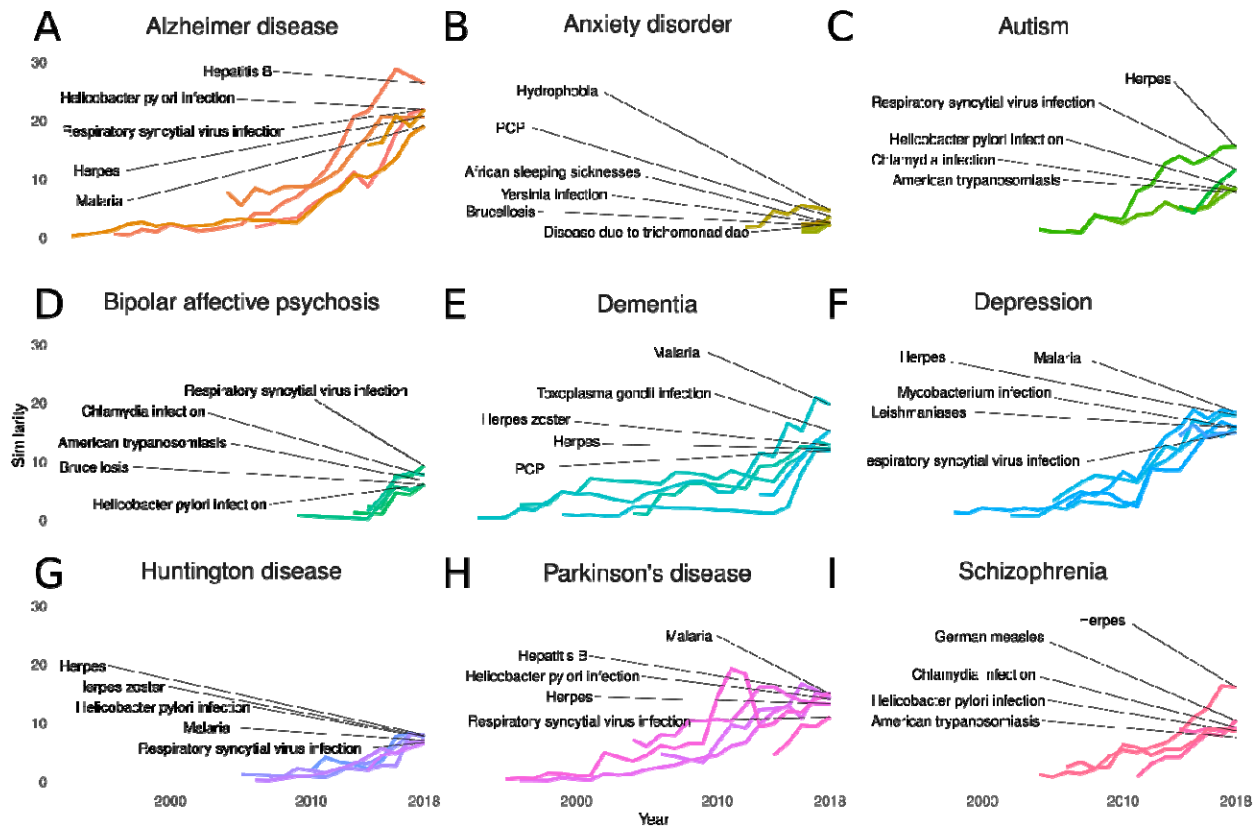

213

214

215 **Figure S3. Disease-disease similarity evolution between psychiatric and infectious**

216 **diseases from 1990 to 2018. A–I.** Evolution of the similarity between psychiatric disorders and

217 infectious diseases: Alzheimer's disease (A), anxiety disorder (B), autism (C), bipolar disorder

218 (D), dementia (E), depression (F), Huntington's disease (G), Parkinson's disease (H), and

219 schizophrenia (I). Similarity scores represent the  $-\log_{10}$ pval of the Fisher's exact test result of

220 the gene overlap between each disease pair in each year from 1990 to 2018.

221

222           Autoimmune inflammatory diseases, such as systemic lupus erythematosus, arthritis,  
223 and psoriasis, also showed strong gene sharing with viral infections such as hepatitis B and C,  
224 respiratory syncytial virus (RSV) infection, influenza, and HIV (Figs. 2C and S4). The  
225 association between viral infections and autoimmune diseases is well documented (Getts et al.,  
226 2013). For instance, the SARS-CoV-2 virus can trigger Guillain–Barré syndrome, a neurological  
227 autoimmune disease, in COVID-19 patients (Dalakas, 2020). Dengue patients also present a  
228 higher risk of developing autoimmune diseases, such as systemic lupus erythematosus and  
229 vasculitis (Li et al., 2018), an association that was also captured in our analysis of the scientific  
230 literature since the late 1990s (Fig. S4I).  
231



## Inflammatory vs. infectious

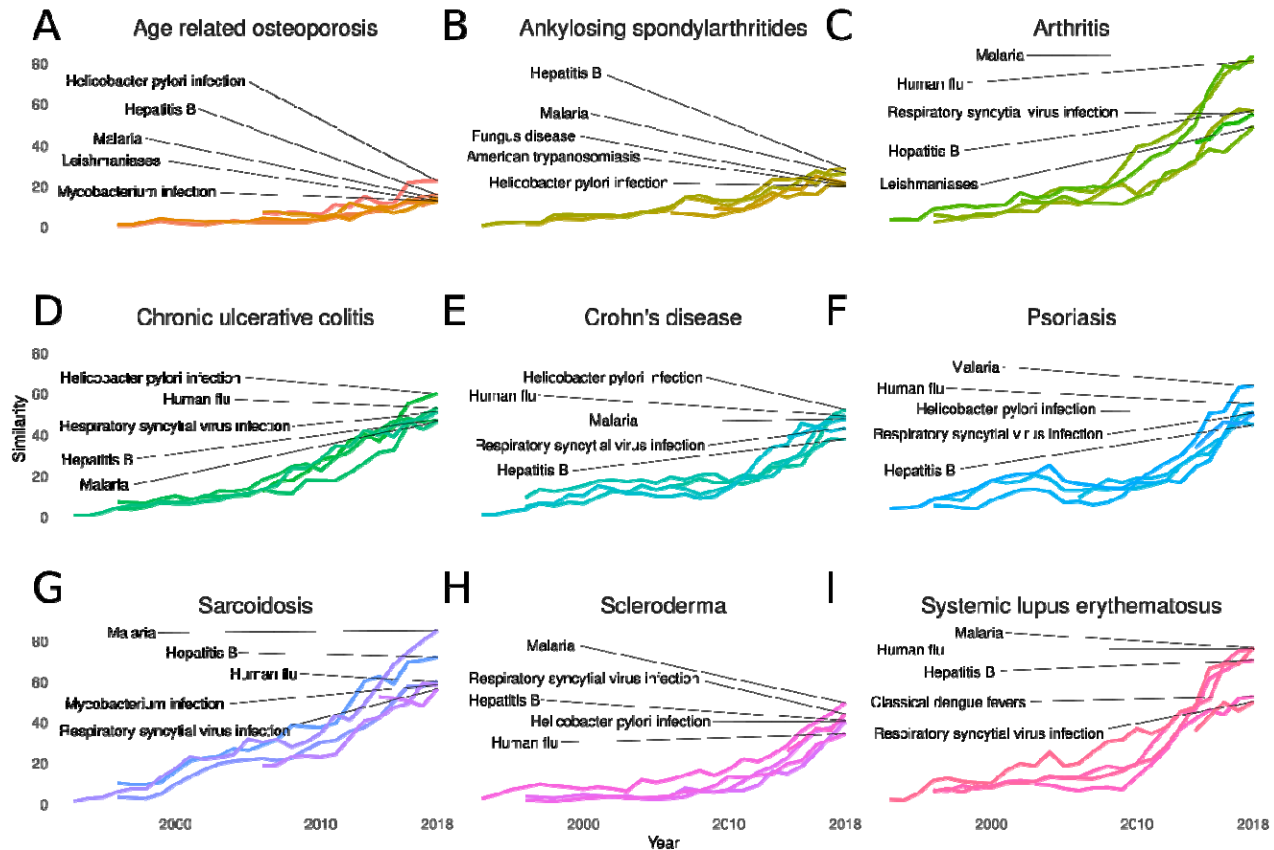

232

233

234 **Figure S4. Disease-disease similarity evolution between inflammatory and infectious**

235 **diseases from 1990 to 2018. A–I.** Evolution of the similarity between psychiatric disorders and

236 **infectious diseases: age related osteoporosis (A), ankylosing spondylarthritis (B), arthritis (C),**

237 **chronic ulcerative colitis (D), Crohn's disease (E), psoriasis (F), sarcoidosis (G), scleroderma**

238 **(H), and systemic lupus erythematosus (I). Similarity scores represent the  $-\log_{10}$ pval of the**

239 **Fisher's exact test result of the gene overlap between each disease pair in each year from 1990**

240 **to 2018.**

241

242           We then examined the number of publications retrieved from PubMed using the topmost  
243 similar pairs of diseases from distinct categories as queries (see Methods section; Fig. 3). The  
244 goal was to find out whether the gene-sharing similarities between diseases from different  
245 categories detected in our networks could also be captured from direct co-occurrence in the  
246 general peer-reviewed literature over the 30-year period. For each disease pair, we obtained a  
247 ratio between the similarity score of the diseases (i.e., the significance of the gene sharing  
248 between them) and the total number of studies retrieved from PubMed that mention both  
249 diseases of the pairs together (Table S4). This similarity-to-paper ratio was used to detect  
250 potentially understudied pairs of diseases that significantly share genes. Low similarity-to-paper  
251 ratio values (Figs. 3A and 3B, light green, and Table S4) represent similar diseases with many  
252 papers already published about them or dissimilar disease pairs. An example of such a pair is  
253 fibromyalgia and depression. These diseases have significant gene sharing and also hundreds  
254 of scientific papers that explore their relationship in the literature (Fig. 3B). Conversely, the  
255 genetic association between osteoporosis and mycobacterial infection is low and so is the  
256 number of papers that investigate these diseases together (Fig. 3B). These cases were  
257 considered as examples of a low knowledge gap between the genetic similarity obtained from  
258 our network analysis and the established literature coverage of the disease pairs.

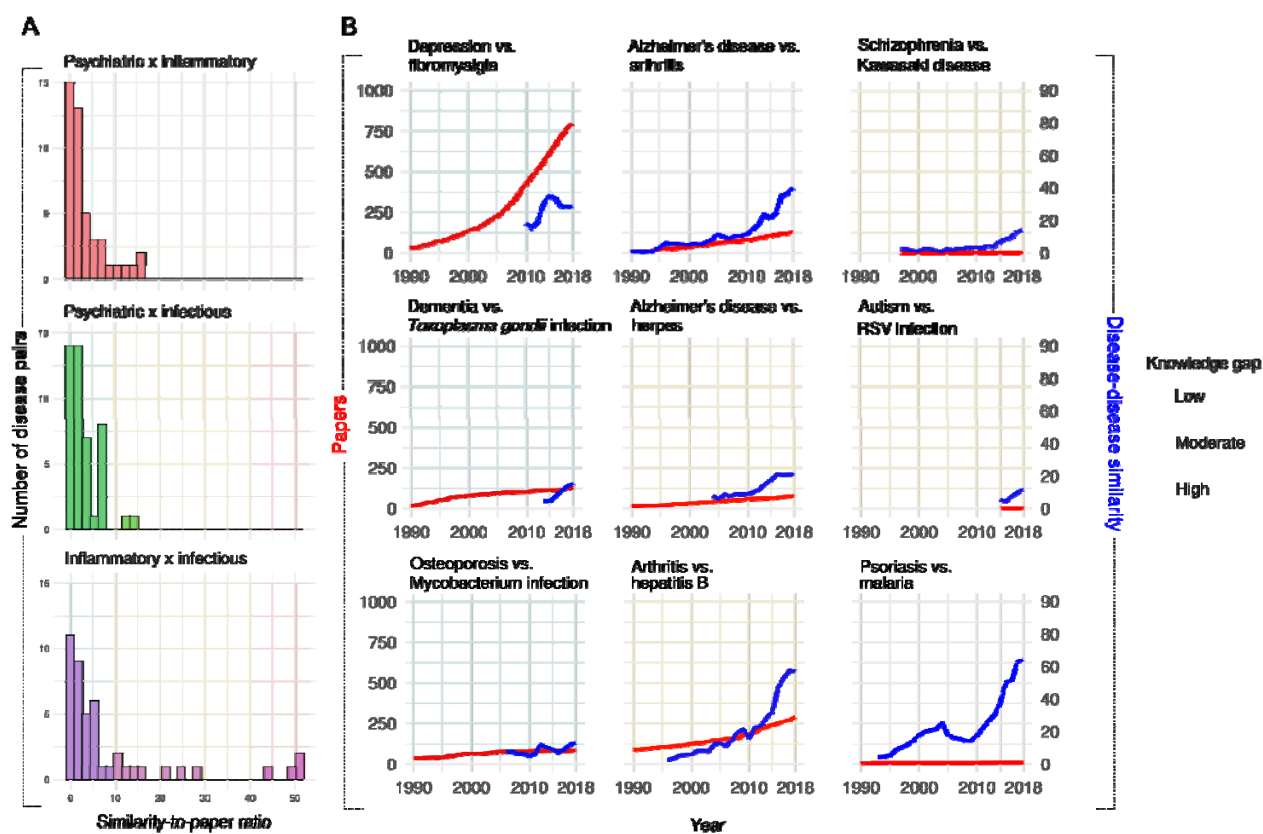

259

260

261 **Figure 3. Evolution of the knowledge gap between diseases of different categories. A.**

262 Number of disease pairs according to the similarity-to-paper ratio index. This index was

263 obtained as a ratio of the similarity score to the total number of papers published for each

264 disease pair in 2018. Low similarity-to-paper ratio (<10) is colored in blue; intermediate

265 similarity-to-paper ratio (10 < ratio < 40) is colored in yellow; and high similarity-to-paper ratio

266 (>40) is colored in pink. **B.** Selected cases of disease pairs with low, intermediate, or high

267 similarity-to-paper ratios depicting the evolution in the number of papers on each pair and the

268 evolution of the similarity between them.

269

270           Cases with an intermediate similarity-to-paper ratio (Figs. 3A and 3B, yellow, and Table  
271 S4) were considered as cases of moderate knowledge gap (Fig. 3A), which was the case for  
272 arthritis and hepatitis B (Fig. 3B). As previously mentioned, several recent studies have  
273 explored the association between viral infections and autoimmune diseases (Dalakas, 2020;  
274 Getts et al., 2013; Li et al., 2018). In 2018, there were over 250 published papers in which  
275 arthritis and hepatitis B were mentioned together (Fig. 3B). Virally mediated arthritis represents  
276 ~1% of all arthritis cases, including cases related to hepatitis B infection (Marks and Marks,  
277 2016). Scientists have detected the hepatitis B virus in the synovial fluid of rheumatological  
278 patients, which could contribute to the pathogenesis of arthritis (Chen et al., 2018). Although  
279 these diseases are known to be clinically associated at least since the 1970s (Mirise and  
280 Kitridou, 1979), our results show that the knowledge on the gene sharing between them  
281 increased rapidly after 2015, which was not followed at the same rate by the number of papers  
282 published on the two diseases together. This represents a potential gap to be explored by novel  
283 research on the genetic bases of the relationship between arthritis and hepatitis B.

284           Lastly, we considered the disease pairs with strong gene sharing and few studies  
285 supporting a direct association as cases of a high knowledge gap (Figs. 3A and 3B, pink, and  
286 Table S4). We suggest that these cases might represent potentially underexplored fields of  
287 research that deserve further investigation. Surprisingly, the number of papers published until  
288 2018 that mentioned psoriasis and malaria together was neglectable (Fig. 3B). These diseases  
289 share 31 genes, one-third of the genes associated with psoriasis, and over 10% of the genes  
290 associated with malaria in the 2018 network. Hydroxychloroquine, a drug used to treat malaria  
291 (Ben-Zvi et al., 2012) and rheumatic diseases, such as arthritis and lupus (Ben-Zvi et al., 2012),

292 can trigger psoriatic lesions (Balak and Hajdarbegovic, 2017). Among a few papers in which  
293 malaria and psoriasis are mentioned together, there is a report from 2014 that describes cases  
294 of hydroxychloroquine-induced psoriasis in patients undergoing malaria treatment (Gravani et  
295 al., 2014). The authors of this study suggest that there should be guidelines for the  
296 management of psoriasis patients who are also at risk of malaria (Gravani et al., 2014). Our  
297 findings corroborate the need for future studies to investigate the association between these  
298 diseases.

299

### 300 **Evolution of biological pathways**

301 We performed a gene overrepresentation analysis (ORA) against Reactome pathways  
302 with the genes associated with the top 9 most connected diseases in each year from 1990 to  
303 2018 (Figs. 4-6 and Table S5). We detected 433 Reactome pathways that presented significant  
304 enrichment ( $p_{\text{adjust}} < 0.01$ ) among the genes of at least one disease (Table S5). Functional  
305 enrichment analysis, such as ORA, often yields too many significant pathways, making these  
306 results difficult to interpret at the individual pathway level. For this reason, we used a network  
307 approach to reduce the complexity of the obtained set of enriched pathways (see Methods  
308 section). Briefly, we built a pathway network (Fig. 4) with the significant Reactome pathways  
309 obtained from the ORA. We connected these pathways to each other according to the gene  
310 sharing between them, similar to what was done in Fig. 1A. We then identified 11 clusters of  
311 closely connected pathways in the network and annotated these clusters according to the main  
312 biological functions of the pathways within them (Fig. 4 and Table S5). One of the detected  
313 clusters grouped several pathways associated with interferon-stimulated genes, interleukins,  
314 and antigen presentation (Fig. 4 and Table S5). The pathways in this cluster were significantly

315 enriched among the genes of diseases in all categories, including malaria, HIV infection,  
316 arthritis, lupus, depression, and Alzheimer’s disease (Fig. 5). The pathways related to  
317 interleukin signaling (e.g., “interleukin 10 signaling”), for instance, were among the top enriched  
318 pathways associated with depression genes in the 2018 network (Fig. 5 and Table S5). Another  
319 cluster of pathways that showed consistent enrichment across all disease categories was NFκB-  
320 mediated inflammation induced by toll-like receptors (TLRs), T-cell receptors (TCRs), and B-cell  
321 receptors (BCRs; Fig. 4). These results illustrate the most recurring theme detected in our  
322 study: psychiatric, inflammatory, and infectious diseases share common immunological  
323 mechanisms that are mostly related to innate immunity and inflammation.

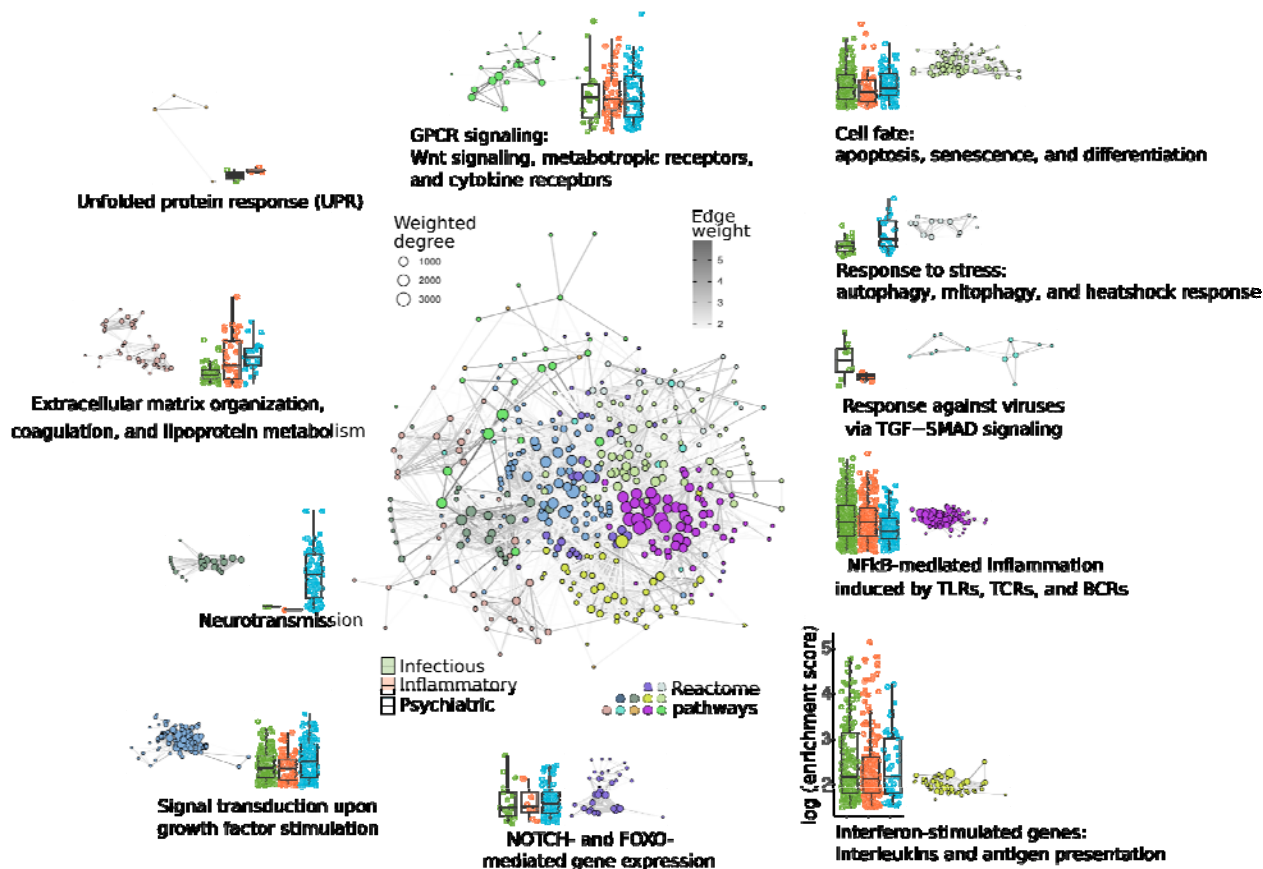

324

325 **Figure 4. Reactome term network built from the ORA results of the genes associated with**

326 **human diseases in 2018.** Significant Reactome ORA terms ( $p.adjust < 0.01$ ) obtained from the

327 genes of the top 9 diseases in the 2018 network were connected to each other according to the

328 significance of the gene sharing between them (edge weight). Only terms with a gene sharing

329 with a  $p.adjust < 0.01$  were connected. We detected 11 clusters (node colors) of closely related

330 terms using the Louvain clustering algorithm in the R package *igraph* (Csardi and Nepusz,

331 2006) and compared the enrichment score distribution of the terms in these clusters in each

332 disease category (box plots). Box plots are colored according to the disease categories: green –

333 infectious diseases, orange – inflammatory diseases, and light blue – psychiatric disorders. Dots

334 in the box plots represent individual enriched Reactome pathways that belong to each network  
 335 cluster.  
 336

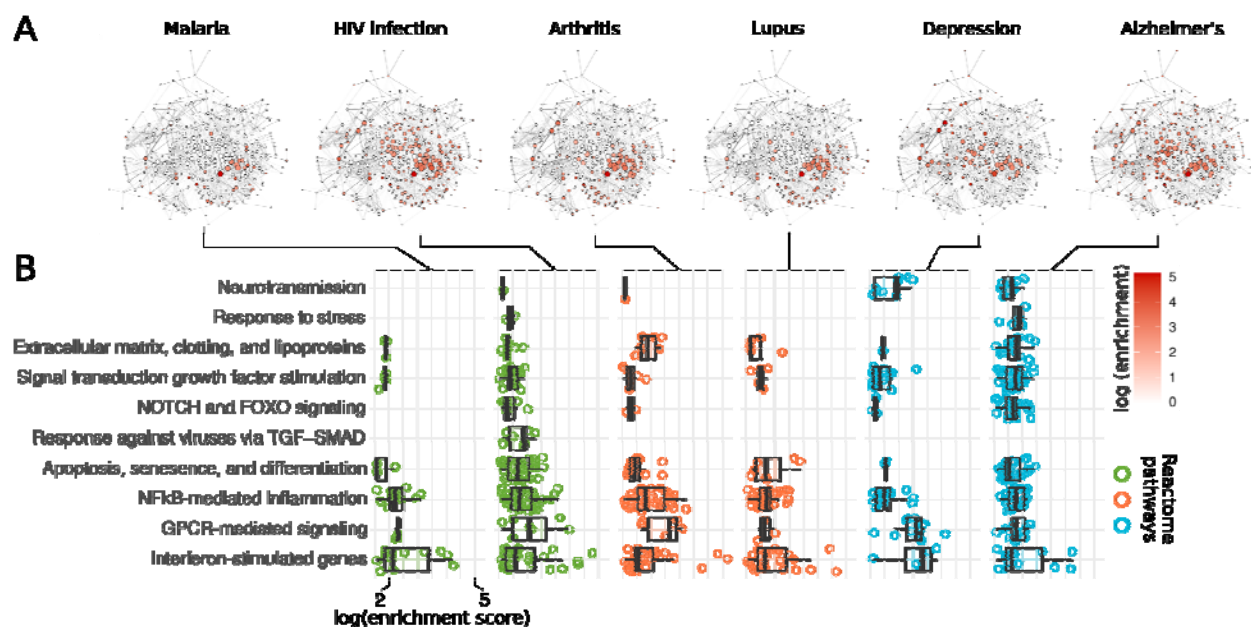

337  
 338  
 339 **Figure 5. Key biological pathways are enriched among the genes associated with human**  
 340 **diseases in 2018. A.** ORA networks depicting the enrichment score of Reactome pathways in  
 341 selected infectious, inflammatory and psychiatric disorders. The networks in A have the same  
 342 topology of the network in Figure 04. The nodes are colored according to the logarithm of  
 343 enrichment score ( $-\log_{10}pval$ ) of the terms represented by each node. **B.** ORA enrichment score  
 344 distribution of the terms in the clusters and diseases from panel A. Box plots are colored  
 345 according to the category of each disease: green – infectious, orange – inflammatory, and light



346 blue – psychiatric. Dots in the box plots represent individual Reactome pathways that belong to  
347 the clusters listed in the y axis and that were enriched in each disease.

348

349         Conversely, we found a cluster of closely connected pathways related to  
350 neurotransmission that were enriched mostly among the genes of psychiatric disorders (Fig. 4  
351 and Table S5). However, three inflammatory and infectious diseases (hepatitis B, arthritis, and  
352 HIV infection) presented enrichment for pathways in this cluster (Fig. 5 and Fig. S5). The genes  
353 related to these diseases presented enrichment for the pathway “transcriptional regulation  
354 MECP2”, a member of the neurotransmission cluster. Methyl CpG binding protein 2 (MECP2) is  
355 located in the X chromosome, and mutations in this gene are the primary cause of Rett  
356 syndrome (Liyanaage and Rastegar, 2014). There is no evidence in the scientific literature that  
357 there is a link between HIV infection or hepatitis B and Rett syndrome, but recent studies  
358 indicate a link between this neurodevelopmental disorder and autoimmune diseases, including  
359 arthritis (De Felice et al., 2016). Moreover, AIDS patients can develop neurological  
360 manifestations similar to those observed in Rett patients, such as cognitive dysfunction and  
361 movement disorders (Brew and Garber, 2018). Our results suggest that the similarity between  
362 Rett syndrome and autoimmune diseases might also occur for infectious diseases of viral  
363 etiology.

364

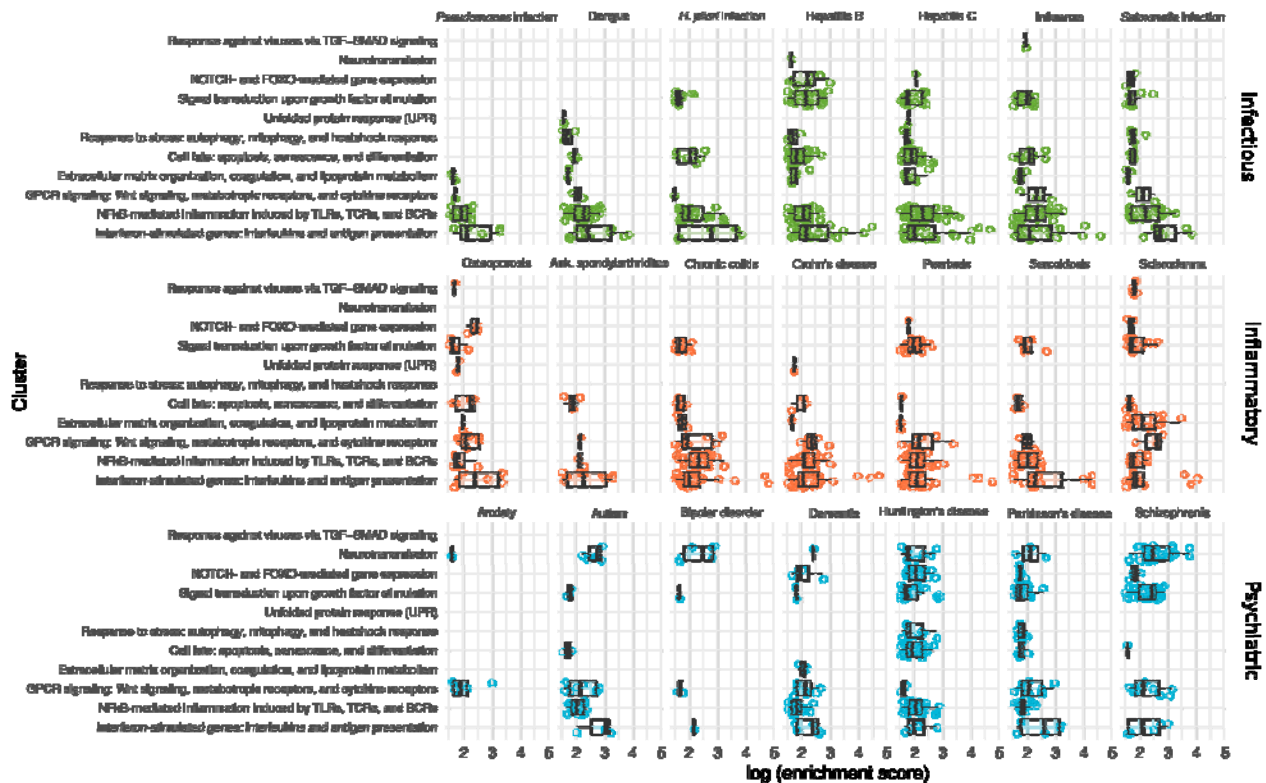

365 **Figure S5. ORA network analysis of genes associated with inflammatory, infectious, and**  
 366 **psychiatric diseases.** Enrichment score distribution of the terms in the clusters from Fig. 4 for  
 367 diseases not depicted in Fig. 5. Box plots illustrate the distribution of the enrichment scores of  
 368 the Reactome pathways in each cluster.

369

370 We also detected other clusters of pathways with similar enrichment results between  
 371 diseases of different categories (Fig. 4). The genes related to arthritis and those related to  
 372 Alzheimer's disease presented enrichment for pathways related to the extracellular matrix  
 373 organization, coagulation, and lipoprotein metabolism (Fig. 5). In arthritis, fibroblast-like  
 374 synoviocytes become hyper-inflammatory and disrupt the extracellular matrix integrity, which  
 375 leads to the degradation of synovial joint collagen (Nygaard and Firestein, 2020). In Alzheimer's

376 disease, some extracellular matrix macromolecules seem to promote the production and  
377 stabilization of amyloid  $\beta$ , while others act to protect neurons from amyloidosis (Sethi and Zaia,  
378 2017). The pathways in the signal transduction on growth factor stimulation and GPCR-  
379 mediated signaling clusters were also enriched among the genes of diseases in all categories  
380 (Figs. 4, 5, and S5). This result was expected because the genes involved in signal transduction  
381 and intracellular signaling are usually shared between cellular pathways and are involved in  
382 virtually all biological functions relevant to diseases (Figs. 5 and S5).

383         After determining the major biological functions related to the genes connected to  
384 infectious, inflammatory, and psychiatric diseases in the 2018 network, we investigated how this  
385 knowledge evolved from 1990 to 2018 (Fig. 6). The pathways related to interferon-stimulated  
386 genes, interleukins, and antigen presentation became enriched for the genes associated with  
387 inflammatory and infectious diseases already since the early 1990s (Fig. 6). Surprisingly, this  
388 enrichment appeared earlier for inflammatory diseases, despite the highly relevant role of  
389 interferon-stimulated genes and antigen presentation in infectious diseases. Conversely, there  
390 was a significant increase in the enrichment of these pathways for the genes related to  
391 depression, autism, and schizophrenia since 2010 (Fig. 6). Recently, the specific roles of the  
392 immune system in psychiatric diseases begun to be revealed (Chen et al., 2016; de Baumont et  
393 al., 2015; Dong et al., 2018; Madore et al., 2016; Yuan et al., 2019). Particularly, neuroglial cells  
394 have gained importance as key neuroimmune players in the development of autism (microglia  
395 and oligodendrocytes; Scuderi and Verkhratsky, 2020), Alzheimer's disease (microglia; Clayton  
396 et al., 2017), and schizophrenia (astrocytes; Gandal et al., 2018). The association of pathways  
397 related to apoptosis, senescence, and cell differentiation with psychiatric disorders has also  
398 occurred recently, except with Alzheimer's disease, which began early in the period (Fig. 6).

399 Alzheimer's, Parkinson's, and Huntington's diseases are neurodegenerative conditions in which  
400 chronic neuronal death happens in distinct parts of the brain (Dugger and Dickson, 2017). We  
401 also found an increasing association in recent years of genes related to autism and depression  
402 to cell fate pathways (Fig. 6), showing that these disorders might also have a neurodegenerative  
403 component. In fact, apoptosis and cell death in response to stress and inflammation are relevant  
404 factors in the pathogenesis of autism (D. Dong et al., 2018) and depression (Leonard, 2018).

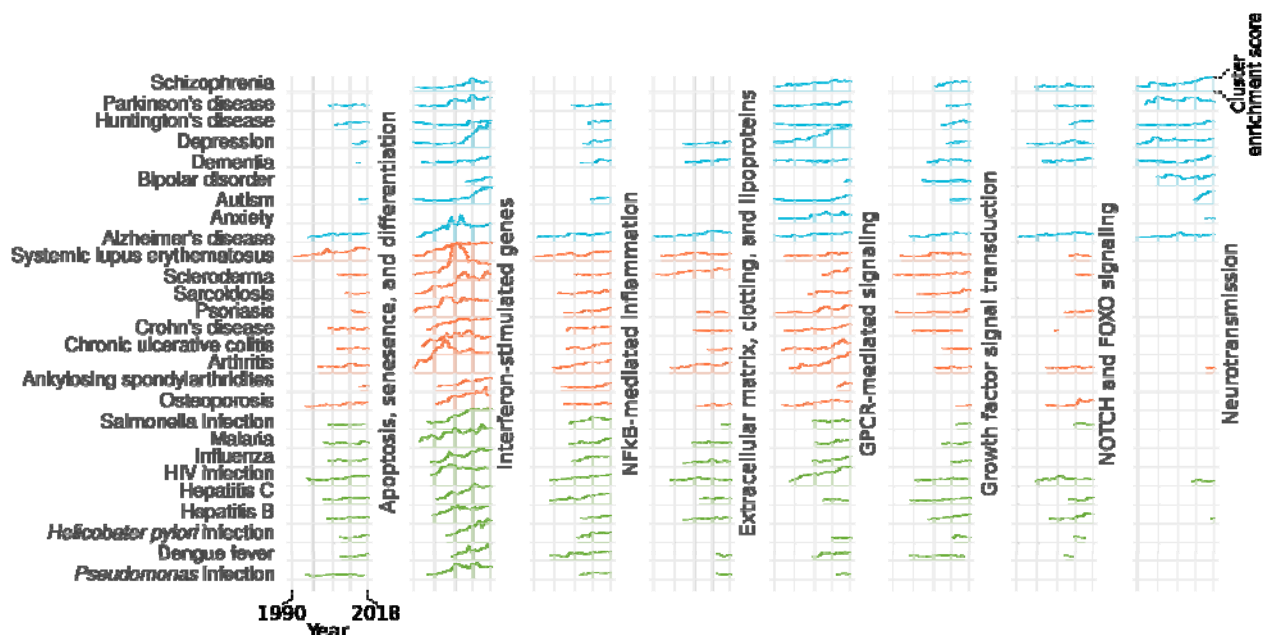

405 **Figure 6. Evolution of knowledge on biological pathways.** Ridge plots of the enrichment  
 406 score of selected clusters from the network in Figure 04 for the top 9 diseases in each category  
 407 from 1990 to 2018. The height of the ridges are proportional to the mean enrichment score  
 408 (mean  $\log_{10}p$ val) of the Reactome pathways in each cluster listed in the y axis.

409

#### 410 Evolution of drug target hub genes

411 Lastly, we examined how drugs that are used to treat inflammatory, infectious, and  
 412 psychiatric diseases target the genes that are shared between the three categories. We found  
 413 that 345 genes were common to all disease categories (Fig. 7A). Ninety-nine genes were  
 414 shared only between inflammatory and psychiatric diseases; 259 were common only between  
 415 psychiatric and infectious diseases; and a total of 409 genes were related exclusively to  
 416 inflammatory and infectious diseases (Fig. 7A). The remaining genes were unique to  
 417 inflammatory (493 genes), psychiatric (869 genes), and infectious diseases (1,209 genes; Fig.  
 418 7A).

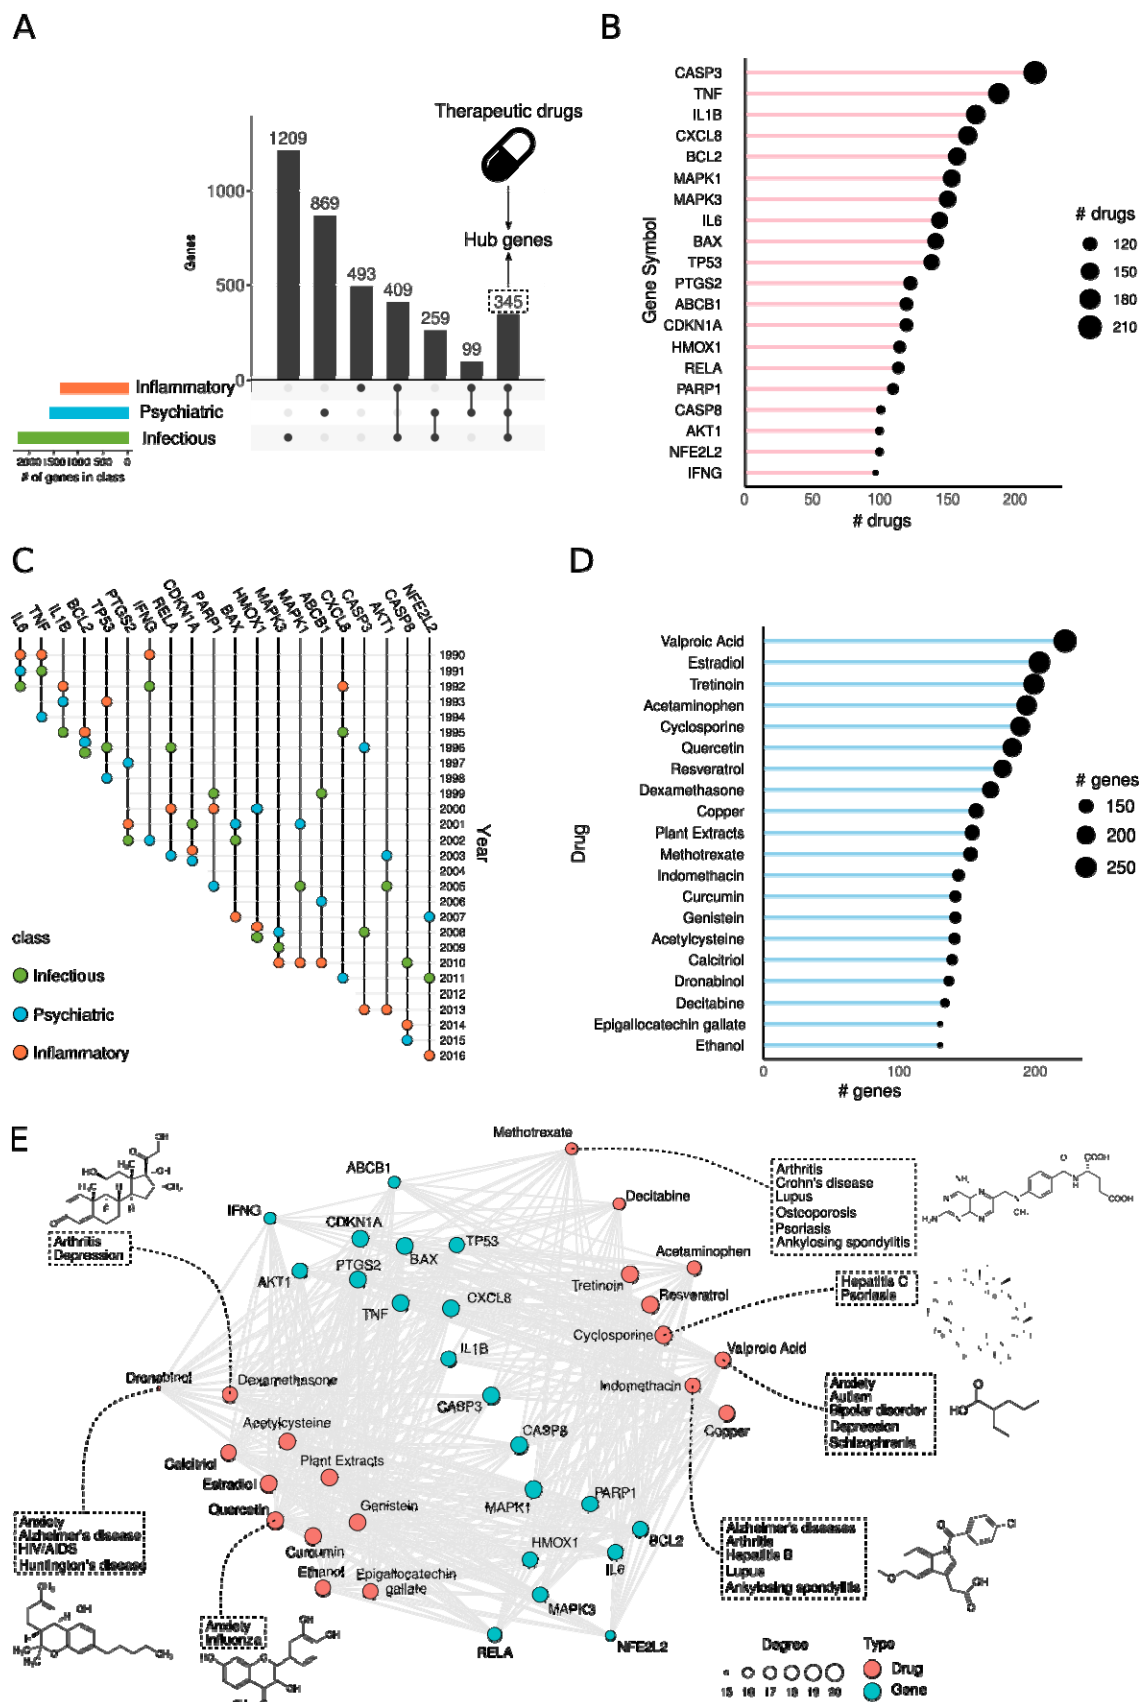

420 **Figure 7. Evolution of drug target hub genes. A.** UpSet plot showing the common genes  
421 between all categories (hub genes), between two categories exclusively and genes that are  
422 unique to each category. **B.** Number of therapeutic drugs of inflammatory, infectious, and  
423 psychiatric diseases that target the top 20 target hub genes according to the comparative  
424 toxicogenomics database (CTD). **C.** Timeline of the association of the top 20 target hub genes  
425 to the gene-disease network. The year in which each gene was associated with the first disease  
426 of each category is depicted by the circles with distinct colors for each category. **D.** Number of  
427 hub genes targeted by the top 20 drugs that target more hubs according to CTD. **E.** Drug-gene  
428 network depicting the top 20 drugs and that target hub genes. We selected a few drugs and  
429 illustrated their molecular structure and diseases for which they are listed as therapeutic  
430 according to CTD.

431

432 We used the comparative toxicogenomics database (CTD; Davis et al., 2021) to find  
433 drugs that have a therapeutic relationship with the top 9 diseases and the list of genes that  
434 these drugs affect (see Methods section). From these lists, we highlight the top 20 most  
435 common target genes of the therapeutic drugs listed by CTD (Fig. 7B). Among these genes, IL6,  
436 TNF, and interferon gamma (IFNG) were already connected to inflammatory diseases in the  
437 1990 network and were gradually related to diseases in the other two categories until 2002 (Fig.  
438 7C). Interleukin 1 beta (IL1B), B-cell lymphoma 2 (BCL2), tumor protein P53 (TP53), and  
439 CXCL8 also appeared in our networks in the early 1990s and were first connected to  
440 inflammatory diseases (Fig. 7C). Eight drug target genes were first connected to psychiatric  
441 disorders (Fig. 7C): caspase 3 (CASP3; 1996), prostaglandin-endoperoxide synthase 2  
442 (PTGS2; 1997), heme oxygenase 1 (HMOX1; 2000), BCL-2-associated X (BAX) and mitogen-



443 activated protein kinase 1 (MAPK1; 2001), RAC-alpha serine/threonine-protein kinase (AKT1;  
444 2003), nuclear factor erythroid 2-related factor 2 (NFE2L2; 2007), and mitogen-activated protein  
445 kinase 1 (MAPK3; 2008). The other 5 genes were first connected to infectious diseases (Fig.  
446 7C): NFkB P65 Subunit (RELA; 1996), poly(ADP-Ribose) polymerase 1 (PARP1) and ATP  
447 binding cassette subfamily B member 1 (ABCB1; 1999), cyclin dependent kinase inhibitor 1A  
448 (CDKN1A; 2001), and caspase 8 (CASP8 ; 2010). All top 20 drug target genes were first  
449 connected to one of the categories until 2010, with the majority of new connections happening  
450 in the 1990s (Fig. 7C). These are very well-known genes involved in inflammation (e.g., IL6 and  
451 IL1B), innate immunity (e.g., IFNG), apoptosis (e.g., CASP3 and CASP8), cell cycle (e.g.,  
452 TP53), and other key biological functions that are altered in several diseases.

453         Next, we found the top 20 therapeutic drugs that affect the most hub genes of  
454 inflammatory, psychiatric, and infectious diseases (Fig. 7D). Valproic acid, a class I histone  
455 deacetylase (HDAC) inhibitor (Göttlicher et al., 2001), was the drug that affected the most hub  
456 genes, 259 (Fig. 7D). According to CTD, among the diseases we analyzed in this study, valproic  
457 acid is a therapeutic drug for anxiety, autism, bipolar disorder, and schizophrenia (Fig. 7E). This  
458 drug is also an efficient anti-convulsant used to treat epilepsy (Tomson et al., 2016) because it  
459 facilitates gamma-aminobutyric acid (GABAergic) neurotransmission (Chateauvieux et al.,  
460 2010). There is extensive evidence in the literature of the anti-inflammatory effects of valproic  
461 acid and its potential use to treat conditions such as spinal cord injury (S. Chen et al., 2018),  
462 renal ischemia (Costalonga et al., 2016), and sepsis-induced heart failure (Shi et al., 2019).  
463 Valproate was also speculated as a potential repurposing candidate to treat diseases caused by  
464 infectious agents, such as COVID-19 (Pitt et al., 2021) and toxoplasmosis (Goodwin et al.,  
465 2008). HDAC inhibitors promote epigenetic modifications in the genome that induce the



466 expression of genes in many biological functions and cell types (Hull et al., 2016). This could  
467 explain valproic acid's versatility and why it ranked first in our analysis.

468         Among the other top 20 drugs, we found molecules that are currently under investigation  
469 for repositioning from one disease category to another. Methotrexate (Fig. 7D), which affects  
470 141 genes among the 345 hubs, is used to treat several inflammatory diseases, including  
471 psoriasis, lupus, and arthritis (Fig. 7E). Recently, a randomized clinical trial revealed a potential  
472 for methotrexate to treat positive symptoms in schizophrenia patients (Chaudhry et al., 2020).  
473 The authors of the trial argue that this effect of methotrexate might be achieved through  
474 resetting of systemic regulatory T-cell control of immune signaling, which is also the way this  
475 drug is thought to act in autoimmune diseases (Chaudhry et al., 2020). The use of anti-  
476 inflammatory drugs for the treatment of neuropsychiatric diseases gained traction in recent  
477 years (Kohler et al., 2016; Ozben and Ozben, 2019; Pandurangi and Buckley, 2020; Rosenblat  
478 et al., 2016) influenced by the increasing evidence that these disorders have underlying immune  
479 causes, which we have extensively demonstrated in this study. Dexamethasone (Fig. 7D) is a  
480 glucocorticoid anti-inflammatory drug listed in CTD as a therapy for arthritis and depression (Fig.  
481 7E), but it is also used to treat several other inflammatory disorders. Indeed, dexamethasone  
482 was one of the few drugs submitted to randomized clinical trials that reduced mortality in  
483 COVID-19 patients subjected to invasive ventilation (RECOVERY Collaborative Group, 2021).  
484 Several of the other top 20 drugs were also listed in CTD to be used as therapy for diseases of  
485 different categories, such as cyclosporine (hepatitis C and psoriasis), indomethacin (Alzheimer's  
486 and autoimmune diseases), dronabinol (neuropsychiatric diseases and HIV infection), and  
487 quercetin (anxiety and influenza; Fig. 7E).

488

## 489 Discussion

490 Similar to the exponential increase in the number of published papers seen in the past  
491 decades (Fortunato et al., 2018), the number of genes associated with psychiatric,  
492 inflammatory, and infectious diseases have also increased significantly in the past 30 years .  
493 This rapid growth in knowledge about the genetic underpinnings of these diseases can be  
494 directly attributed to at least two historical landmarks: the publication of the human genome in  
495 2001 (Lander et al., 2001; Venter et al., 2001) and the advent of high-throughput DNA-  
496 sequencing technologies (Margulies et al., 2005). Discrete advances in genes associated with  
497 specific diseases could also be spotted throughout the period analyzed here. In 1996, the triple  
498 therapy for HIV was developed using nucleoside reverse-transcriptase inhibitors and protease  
499 inhibitors (Hammer et al., 1996). In the same year, 50% of the new genes added to the  
500 knowledge network were connected to HIV infection. In 2005, a peak of novel genes associated  
501 with psoriasis and systemic lupus erythematosus was detected. This year also saw the  
502 discovery of the Th<sub>17</sub> cell lineage (Langrish et al., 2005). The central role of these pro-  
503 inflammatory cells in the pathogenesis of autoimmune and infectious diseases was later  
504 identified (Zambrano-Zaragoza et al., 2014). Indeed, the key genes of the differentiation and  
505 maintenance of the Th<sub>17</sub> phenotype in CD4<sup>+</sup> T lymphocytes, such as interleukin 17F (IL17F),  
506 interleukin 21 (IL21), the peroxisome proliferator-activated receptor gamma (PPARG), and the  
507 fatty acid-binding protein 5 (FABP5), were connected to psoriasis and systemic lupus  
508 erythematosus in the network in 2005 (Hwang, 2010; Nalbant and Eskier, 2016).

509 One of the advantages of using text mining and network medicine to study the  
510 relationships between genes and diseases is the possibility of detecting novel connections from  
511 established scientific knowledge. When two diseases share a genetic mechanism, they can also

512 present common clinical or epidemiological characteristics, despite having distinct etiological  
513 backgrounds (Barabási et al., 2011). These similarities can inform researchers of potential  
514 treatment options (Lüscher Dias et al., 2020). Here, we showed that diseases from  
515 inflammatory, psychiatric, and infectious etiologies significantly share genes with each other.  
516 This sharing was strong between disease pairs that were well studied together, such as  
517 depression and fibromyalgia. Conversely, the gene sharing between psoriasis and malaria could  
518 be perceived in our knowledge networks since the 2000s, but the number of papers featuring  
519 the two conditions together in PubMed is virtually null. We detected a few such cases, mostly  
520 involving neglected infectious diseases, which could explain the knowledge gap. We also found  
521 cases of diseases that just recently began to share genes that also lack many publications  
522 directly connecting them in the literature. A case in point is autism and RSV. We also found  
523 disease pairs, such as dementia and *Toxoplasma gondii* infection, for which there have been  
524 direct associations in the literature since 1990, but that just recently started to share genes in  
525 the network. Our results reveal potentially underexplored pathways for future research on the  
526 association between diseases of distinct categories and also for the discovery of new genes  
527 related to well-studied disease pairs.

528         The sharing of genes between diseases from distinct categories also reflects in the  
529 overlap of biological functions, particularly those related to immunological processes. The genes  
530 of several diseases in all categories presented enrichment for Reactome pathways related to  
531 the interferon response, cytokines, and NFkB-mediated inflammation. This pattern was  
532 detectable in our networks since the early 1990s for inflammatory diseases and gradually  
533 appeared for infectious and psychiatric diseases as well. Pathways associated with  
534 neurotransmission were almost exclusively enriched among the genes of psychiatric diseases.

535 Nevertheless, we found enrichment for a neurotransmission-related pathway, “transcriptional  
536 regulation by MECP2”, among the genes of HIV infection and hepatitis B that could point to a  
537 connection between these disorders and Rett syndrome, a neurological condition. Our  
538 functional enrichment results also highlighted the relevance of core cellular functions in  
539 diseases of all categories, such as signal transduction and the regulation of gene expression by  
540 transcription factors.

541 Our network medicine text mining approach also revealed how shared genes between  
542 disease categories can signal toward common therapeutic solutions. The findings presented in  
543 the last section of our study emphasize the relevance of drugs that target shared genes for the  
544 treatment of distinct diseases. Our results show that the genes targeted by therapeutic drugs  
545 shared by inflammatory, psychiatric, and infectious diseases have been associated with these  
546 disorders early in the past 30 years of scientific research. These genes are associated with  
547 inflammation, the cell cycle, apoptosis, and central pathways of cellular function. We also  
548 demonstrated that well-established and promising cases of repositioning involve drugs that  
549 target shared genes between diseases. Future studies should aim to reveal more common  
550 molecular mechanisms between these categories of diseases as well as to harness that  
551 knowledge for novel drug discovery and repurposing.

552 In summary, we could apply a machine learning and cognitive computing text-mining  
553 strategy using WDD to extract knowledge about genes related to inflammatory, infectious, and  
554 psychiatric diseases from the scientific literature and depict how this knowledge evolved during  
555 the past 30 years.

## 556 **Methods**

### 557 **Knowledge network construction**

558 We built knowledge networks containing interactions between diseases and genes using  
559 the WDD (Y. Chen et al., 2016). WDD discovers connections between genes and diseases  
560 using a natural language processing algorithm that reads full texts from PMC open access  
561 journals, patents, and abstracts in the MEDLINE (PubMed) database. A connection is found  
562 when two terms of interest (e.g., genes and diseases) are detected in the same sentence,  
563 separated by a preposition or a verb. These connections can be derived from many sources of  
564 evidence, such as gene expression, disease-associated mutations, genome-wide association  
565 studies, or protein expression experiments. WDD attributes a confidence score (0–100%) to  
566 each association based on the number of documents in which the relation is found and also on  
567 the semantic relevance of the link, determined by the natural language processing algorithm.

568 We performed independent searches on WDD with 27 inflammatory diseases, 63  
569 infectious diseases, and 9 psychiatric and neurological disorders (Table S1) in July 2018. WDD  
570 returned lists of genes related to these diseases according to the scientific literature in each  
571 year from 1990 to 2018. These associations are cumulative, that is, the genes associated with  
572 the diseases in 2018 include all the associations present in the previous year. We only kept  
573 connections between genes and diseases supported by a confidence score of at least 50% and  
574 2 documents of evidence. Custom R code was used to process, filter, and analyze data and to  
575 plot figures. The full code of all analyses and figures in this study is available at  
576 [https://github.com/csbl-usp/evolution\\_of\\_knowledge](https://github.com/csbl-usp/evolution_of_knowledge).

577

578

## 579 Evolution of knowledge

580 We calculated Fisher's exact test p-value of the gene overlap between each pair of  
581 diseases in each year from 1990 to 2018. The total number of genes connected in the network  
582 in each year was used as Fisher's exact test universe. For each year, a disease-disease  
583 knowledge network was developed using the  $-\log_{10}pval$  of the Fisher's exact test ("disease-  
584 disease similarity") as the edge weight for each disease pair. The networks were constructed  
585 using the R package *igraph* (Csardi and Nepusz, 2006) and plotted using the package *ggraph*.  
586 We detected new genes in each year by comparing the list of genes of the diseases in one year  
587 to the list of genes of the same disease in the previous year. Thus, we obtained a list of new  
588 genes that were added to the network in each year from 1991 to 2018. The total number of  
589 genes associated with each disease was also calculated for each year. Line, violin, and ridge  
590 plots were created to illustrate the results using *ggplot2* (Wickham, 2016).

591

## 592 Evolution of disease relationships between categories

593 For the top 9 diseases of each category that were connected to the most genes in 2018  
594 ("top 9 diseases"), we detected the diseases from the other two categories with the most  
595 significant gene sharing between them ("disease pairs") and analyzed how these relationships  
596 evolved from 1990 to 2018. The disease-disease similarity scores obtained previously were also  
597 used in this analysis. We used the *MeSH.db* R package (Tsuyuzaki et al., 2015) to obtain the  
598 MeSH IDs and terms of all 99 diseases. Using the obtained MeSH terms of the diseases in each  
599 pair, we used the *easyPubMed* R package to search for PubMed papers in which both disease  
600 MeSHes were found together. We then used an adapted version of the *fetch\_pubmed\_data*  
601 function (see code in GitHub) of the *easyPubMed* package to retrieve the number of papers that

602 contained the searched MeSH pairs in each year from 1990 to 2018. We used the disease-  
603 disease similarity score and the number of papers in 2018 to calculate a similarity-to-paper ratio  
604 for each disease pair as follows:

$$similarity.paper.ratio = \frac{dis.dis.similarity}{numberofpapers}$$

605 Low similarity-to-paper ratios (<10) were considered as cases of low knowledge gap between  
606 the gene sharing and the general scientific interest in the disease pairs. Pairs in this category  
607 included those in which the diseases did not share a significant amount of genes or pairs of  
608 similar diseases for which there is also a proportional number of papers that cite the two  
609 diseases together. Ratios between 10 and 40 were considered as cases of intermediate  
610 knowledge gap, that is, the diseases in the pair are similar in the genes they share, but the  
611 number of papers on the two diseases together is not proportionally high. High similarity-to-  
612 paper ratios (>40) were interpreted as cases of a large knowledge gap. The pairs that fell in this  
613 category include diseases that share a significant proportion of their genes but that have almost  
614 never been studied together, evidenced by the very low number of papers including the two  
615 MeSH terms.

616

### 617 **Evolution of biological pathways**

618 We used the *enricher* function of the R package *clusterProfiler* (Yu et al., 2012) to  
619 perform an ORA against Reactome pathways of the genes associated with the top 9 diseases of  
620 each category in each year. We selected the significant Reactome pathways (p.adjust < 0.01) of  
621 the top 9 diseases in 2018 and calculated the significance of the gene overlap between these  
622 pathways with Fisher's exact test. We considered only the genes of each significant pathway  
623 that were also present in the 2018 gene-disease network. By doing this, we limited pathways to

624 cluster according to the genes shared from our data set, not all the genes in the pathways. We  
625 then built a pathway network connecting the significant Reactome terms using the  $-\log_{10}p$ value  
626 of the Fisher's exact tests as edge weights, similar to what was done for the disease-disease  
627 network in Fig. 1A. We detected clusters of pathways in this network using the *cluster\_louvain*  
628 function (Blondel et al., 2008) of the *igraph* R package (Csardi and Nepusz, 2006). Edge  
629 weights were considered for the cluster detection. We calculated the weighted degree of each  
630 pathway in the network using the *strength* function of the *igraph* package (Csardi and Nepusz,  
631 2006). We manually annotated the detected clusters for their major biological function using the  
632 pathways with the highest weighted degree in each cluster as reference. The significance  
633 values ( $-\log_{10}p$ val) of ORA for the pathways in each cluster were used to make box and ridge  
634 plots to illustrate the results for each disease in 2018 and how these results changed from 1990  
635 to 2018.

636

### 637 **Evolution of drug target hub genes**

638 Using the 2018 gene-disease network, we detected the genes common to all three  
639 categories of diseases ("hub genes"). We used the R package *UpsetR* to visualize the number  
640 of genes shared and exclusive to the disease categories. We downloaded the drug-gene and  
641 the drug-disease interaction databases from the CTD (<http://ctdbase.org/>; Davis et al., 2021).  
642 We used the MeSH terms of the 99 diseases to filter the drug-disease database and kept only  
643 interactions between drugs and diseases that were listed as "therapeutic" by CTD. These are  
644 cases of a "chemical that has a known or potential therapeutic role in a disease (e.g., chemical  
645 X is used to treat leukemia)", according to the CTD glossary (Davis et al., 2021). We filtered the  
646 drug-gene database and kept only the interactions between the therapeutic drugs and the hub



647 genes of our analysis. This final drug-gene list was used to detect the top 20 drugs that target  
648 the most hub genes and the top 20 hub genes most targeted by the therapeutic drugs. We  
649 visualized these drug-gene interactions in a network built with the R packages *igraph* and  
650 plotted with *ggplot2* and *ggraph*. We used the yearly gene-disease networks to detect when the  
651 top 20 drug target hub genes were first connected to diseases in each category to build a  
652 timeline.

653

#### 654 **Competing interests**

655 We declare that the authors have no conflicts of interest.

656

#### 657 **Data availability**

658 The data and code used to produce the analyses and figures in this study are available  
659 at [https://github.com/csbl-usp/evolution\\_of\\_knowledge](https://github.com/csbl-usp/evolution_of_knowledge).

660

#### 661 **Author Contribution**

662 Conceptualization, Investigation, Data Curation and Writing: TLD, RJSD, PPA, VS, GRF  
663 and HIN. Software Programming, Formal analysis: TLD, VS, TLA. Repository was developed by  
664 TLD and TLA. Resources, Writing Review & Editing: TLD, RJSD, PPA, VS, GRF and HIN;  
665 Supervision and Funding acquisition: GRF and HIN.

666

#### 667 **Funding**

668 This work was supported by Brazilian National Council for Scientific and Technological  
669 Development (grant numbers 313662/2017-7); the São Paulo Research Foundation (grant

670 numbers 2018/14933-2).

671

## 672 References

- 673 Bai T, Gong L, Wang Ye, Wang Yan, Kulikowski CA, Huang L. 2016. A method for exploring  
674 implicit concept relatedness in biomedical knowledge network. *BMC Bioinformatics* **17**  
675 **Suppl 9**:265. doi:10.1186/s12859-016-1131-5
- 676 Balak DM, Hajdarbegovic E. 2017. Drug-induced psoriasis: clinical perspectives. *Psoriasis*  
677 (*Auckl*) **7**:87–94. doi:10.2147/PTT.S126727
- 678 Barabási A-L, Gulbahce N, Loscalzo J. 2011. Network medicine: a network-based approach to  
679 human disease. *Nat Rev Genet* **12**:56–68. doi:10.1038/nrg2918
- 680 Ben-Zvi I, Kivity S, Langevitz P, Shoenfeld Y. 2012. Hydroxychloroquine: from malaria to  
681 autoimmunity. *Clin Rev Allergy Immunol* **42**:145–153. doi:10.1007/s12016-010-8243-x
- 682 Blondel VD, Guillaume J-L, Lambiotte R, Lefebvre E. 2008. Fast unfolding of communities in  
683 large networks. *J Stat Mech* **2008**:P10008. doi:10.1088/1742-5468/2008/10/P10008
- 684 Brew BJ, Garber JY. 2018. Neurologic sequelae of primary HIV infection. *Handb Clin Neurol*  
685 **152**:65–74. doi:10.1016/B978-0-444-63849-6.00006-2
- 686 Brooks PJ, Tagle DA, Groft S. 2014. Expanding rare disease drug trials based on shared  
687 molecular etiology. *Nat Biotechnol* **32**:515–518. doi:10.1038/nbt.2924
- 688 Carson MB, Liu C, Lu Y, Jia C, Lu H. 2017. A disease similarity matrix based on the uniqueness  
689 of shared genes. *BMC Med Genomics* **10**:26. doi:10.1186/s12920-017-0265-2
- 690 Chateauvieux S, Morceau F, Dicato M, Diederich M. 2010. Molecular and therapeutic potential  
691 and toxicity of valproic acid. *J Biomed Biotechnol* **2010**. doi:10.1155/2010/479364
- 692 Chaudhry IB, Husain MO, Khoso AB, Husain MI, Buch MH, Kiran T, Fu B, Bassett P, Qurashi I,  
693 Ur Rahman R, Baig S, Kazmi A, Corsi-Zuelli F, Haddad PM, Deakin B, Husain N. 2020. A  
694 randomised clinical trial of methotrexate points to possible efficacy and adaptive immune  
695 dysfunction in psychosis. *Transl Psychiatry* **10**:415. doi:10.1038/s41398-020-01095-8
- 696 Chen H, Liu S, Ji L, Wu T, Ji Y, Zhou Y, Zheng M, Zhang M, Xu W, Huang G. 2016. Folic acid  
697 supplementation mitigates alzheimer's disease by reducing inflammation: A randomized  
698 controlled trial. *Mediators Inflamm* **2016**:5912146. doi:10.1155/2016/5912146
- 699 Chen S, Ye J, Chen X, Shi J, Wu W, Lin Wenping, Lin Weibin, Li Y, Fu H, Li S. 2018. Valproic  
700 acid attenuates traumatic spinal cord injury-induced inflammation via STAT1 and NF-κB  
701 pathway dependent of HDAC3. *J Neuroinflammation* **15**:150. doi:10.1186/s12974-018-  
702 1193-6
- 703 Chen Y, Elenee Argentinis JD, Weber G. 2016. IBM watson: how cognitive computing can be  
704 applied to big data challenges in life sciences research. *Clin Ther* **38**:688–701.  
705 doi:10.1016/j.clinthera.2015.12.001
- 706 Chen Y-L, Jing J, Mo Y-Q, Ma J-D, Yang L-J, Chen L-F, Zhang X, Yan T, Zheng D-H, Pessler F,  
707 Dai L. 2018. Presence of hepatitis B virus in synovium and its clinical significance in  
708 rheumatoid arthritis. *Arthritis Res Ther* **20**:130. doi:10.1186/s13075-018-1623-y
- 709 Clayton KA, Van Enoo AA, Ikezu T. 2017. Alzheimer's disease: the role of microglia in brain  
710 homeostasis and proteopathy. *Front Neurosci* **11**:680. doi:10.3389/fnins.2017.00680
- 711 Costalonga EC, Silva FMO, Noronha IL. 2016. Valproic Acid Prevents Renal Dysfunction and

- 712 Inflammation in the Ischemia-Reperfusion Injury Model. *Biomed Res Int* **2016**:5985903.  
713 doi:10.1155/2016/5985903
- 714 Csardi G, Nepusz T. 2006. The igraph software package for complex network research.  
715 *InterJournal Complex Systems*:1695.
- 716 Dalakas MC. 2020. Guillain-Barré syndrome: The first documented COVID-19-triggered  
717 autoimmune neurologic disease: More to come with myositis in the offing. *Neurol*  
718 *Neuroimmunol Neuroinflamm* **7**. doi:10.1212/NXI.0000000000000781
- 719 Davis AP, Grondin CJ, Johnson RJ, Sciaky D, Wieggers J, Wieggers TC, Mattingly CJ. 2021.  
720 Comparative Toxicogenomics Database (CTD): update 2021. *Nucleic Acids Res*  
721 **49**:D1138–D1143. doi:10.1093/nar/gkaa891
- 722 de Baumont A, Maschietto M, Lima L, Carraro DM, Olivieri EH, Fiorini A, Barreta LAN, Palha  
723 JA, Belmonte-de-Abreu P, Moreira Filho CA, Brentani H. 2015. Innate immune response is  
724 differentially dysregulated between bipolar disease and schizophrenia. *Schizophr Res*  
725 **161**:215–221. doi:10.1016/j.schres.2014.10.055
- 726 De Felice C, Leoncini S, Signorini C, Cortelazzo A, Rovero P, Durand T, Ciccoli L, Papini AM,  
727 Hayek J. 2016. Rett syndrome: An autoimmune disease? *Autoimmun Rev* **15**:411–416.  
728 doi:10.1016/j.autrev.2016.01.011
- 729 Dong D, Zielke HR, Yeh D, Yang P. 2018. Cellular stress and apoptosis contribute to the  
730 pathogenesis of autism spectrum disorder. *Autism Res* **11**:1076–1090.  
731 doi:10.1002/aur.1966
- 732 Dong Y, Lagarde J, Xicota L, Corne H, Chantran Y, Chaigneau T, Crestani B, Bottlaender M,  
733 Potier M-C, Aucouturier P, Dorothée G, Sarazin M, Elbim C. 2018. Neutrophil  
734 hyperactivation correlates with Alzheimer's disease progression. *Ann Neurol* **83**:387–405.  
735 doi:10.1002/ana.25159
- 736 Dugger BN, Dickson DW. 2017. Pathology of neurodegenerative diseases. *Cold Spring Harb*  
737 *Perspect Biol* **9**. doi:10.1101/cshperspect.a028035
- 738 Eimer WA, Vijaya Kumar DK, Navalpur Shanmugam NK, Rodriguez AS, Mitchell T, Washicosky  
739 KJ, György B, Breakefield XO, Tanzi RE, Moir RD. 2018. Alzheimer's Disease-Associated  
740  $\beta$ -Amyloid Is Rapidly Seeded by Herpesviridae to Protect against Brain Infection. *Neuron*  
741 **100**:1527–1532. doi:10.1016/j.neuron.2018.11.043
- 742 Fortunato S, Bergstrom CT, Börner K, Evans JA, Helbing D, Milojević S, Petersen AM, Radicchi  
743 F, Sinatra R, Uzzi B, Vespignani A, Waltman L, Wang D, Barabási A-L. 2018. Science of  
744 science. *Science* **359**. doi:10.1126/science.aao0185
- 745 Galvez-Sánchez CM, Montoro CI, Duschek S, Reyes Del Paso GA. 2020. Depression and trait-  
746 anxiety mediate the influence of clinical pain on health-related quality of life in fibromyalgia.  
747 *J Affect Disord* **265**:486–495. doi:10.1016/j.jad.2020.01.129
- 748 Gandal MJ, Zhang P, Hadjimichael E, Walker RL, Chen C, Liu S, Won H, van Bakel H,  
749 Varghese M, Wang Y, Shieh AW, Haney J, Parhami S, Belmont J, Kim M, Moran Losada P,  
750 Khan Z, Mleczko J, Xia Y, Dai R, Geschwind DH. 2018. Transcriptome-wide isoform-level  
751 dysregulation in ASD, schizophrenia, and bipolar disorder. *Science* **362**.

- 752 doi:10.1126/science.aat8127
- 753 Getts DR, Chastain EML, Terry RL, Miller SD. 2013. Virus infection, antiviral immunity, and  
754 autoimmunity. *Immunol Rev* **255**:197–209. doi:10.1111/imr.12091
- 755 Gibney SM, Drexhage HA. 2013. Evidence for a dysregulated immune system in the etiology of  
756 psychiatric disorders. *J Neuroimmune Pharmacol* **8**:900–920. doi:10.1007/s11481-013-  
757 9462-8
- 758 Goodwin DG, Strobl J, Mitchell SM, Zajac AM, Lindsay DS. 2008. Evaluation of the mood-  
759 stabilizing agent valproic acid as a preventative for toxoplasmosis in mice and activity  
760 against tissue cysts in mice. *J Parasitol* **94**:555–557. doi:10.1645/GE-1331.1
- 761 Göttlicher M, Minucci S, Zhu P, Krämer OH, Schimpf A, Giavara S, Sleeman JP, Lo Coco F,  
762 Nervi C, Pelicci PG, Heinzl T. 2001. Valproic acid defines a novel class of HDAC inhibitors  
763 inducing differentiation of transformed cells. *EMBO J* **20**:6969–6978.  
764 doi:10.1093/emboj/20.24.6969
- 765 Gravani A, Gaitanis G, Zioga A, Bassukas ID. 2014. Synthetic antimalarial drugs and the  
766 triggering of psoriasis - do we need disease-specific guidelines for the management of  
767 patients with psoriasis at risk of malaria? *Int J Dermatol* **53**:327–330. doi:10.1111/ijd.12231
- 768 Hammer SM, Katzenstein DA, Hughes MD, Gundacker H, Schooley RT, Haubrich RH, Henry  
769 WK, Lederman MM, Phair JP, Niu M, Hirsch MS, Merigan TC. 1996. A trial comparing  
770 nucleoside monotherapy with combination therapy in HIV-infected adults with CD4 cell  
771 counts from 200 to 500 per cubic millimeter. AIDS Clinical Trials Group Study 175 Study  
772 Team. *N Engl J Med* **335**:1081–1090. doi:10.1056/NEJM199610103351501
- 773 Harris SA, Harris EA. 2015. Herpes simplex virus type 1 and other pathogens are key causative  
774 factors in sporadic alzheimer's disease. *J Alzheimers Dis* **48**:319–353. doi:10.3233/JAD-  
775 142853
- 776 Hull EE, Montgomery MR, Leyva KJ. 2016. HDAC inhibitors as epigenetic regulators of the  
777 immune system: impacts on cancer therapy and inflammatory diseases. *Biomed Res Int*  
778 **2016**:8797206. doi:10.1155/2016/8797206
- 779 Hwang ES. 2010. Transcriptional regulation of T helper 17 cell differentiation. *Yonsei Med J*  
780 **51**:484–491. doi:10.3349/ymj.2010.51.4.484
- 781 Kohler O, Krogh J, Mors O, Benros ME. 2016. Inflammation in Depression and the Potential for  
782 Anti-Inflammatory Treatment. *Curr Neuropharmacol* **14**:732–742.  
783 doi:10.2174/1570159x14666151208113700
- 784 Lander ES, Linton LM, Birren B, Nusbaum C, Zody MC, Baldwin J, Devon K, Dewar K, Doyle M,  
785 FitzHugh W, Funke R, Gage D, Harris K, Heaford A, Howland J, Kann L, Lehoczky J,  
786 LeVine R, McEwan P, McKernan K, et al. 2001. Initial sequencing and analysis of the  
787 human genome. *Nature* **409**:860–921. doi:10.1038/35057062
- 788 Langrish CL, Chen Y, Blumenschein WM, Mattson J, Basham B, Sedgwick JD, McClanahan T,  
789 Kastelein RA, Cua DJ. 2005. IL-23 drives a pathogenic T cell population that induces  
790 autoimmune inflammation. *J Exp Med* **201**:233–240. doi:10.1084/jem.20041257
- 791 Lees CW, Barrett JC, Parkes M, Satsangi J. 2011. New IBD genetics: common pathways with

- 792 other diseases. *Gut* **60**:1739–1753. doi:10.1136/gut.2009.199679
- 793 Leonard BE. 2018. Inflammation and depression: a causal or coincidental link to the  
794 pathophysiology? *Acta Neuropsychiatr* **30**:1–16. doi:10.1017/neu.2016.69
- 795 Li H-M, Huang Y-K, Su Y-C, Kao C-H. 2018. Increased risk of autoimmune diseases in dengue  
796 patients: A population-based cohort study. *J Infect* **77**:212–219.  
797 doi:10.1016/j.jinf.2018.03.014
- 798 Littmann M, Selig K, Cohen-Lavi L, Frank Y, Hönigschmid P, Kataka E, Mösch A, Qian K, Ron  
799 A, Schmid S, Sorbie A, Szlak L, Dagan-Wiener A, Ben-Tal N, Niv MY, Razansky D,  
800 Schuller BW, Ankerst D, Hertz T, Rost B. 2020. Validity of machine learning in biology and  
801 medicine increased through collaborations across fields of expertise. *Nat Mach Intell*.  
802 doi:10.1038/s42256-019-0139-8
- 803 Livanage VRB, Rastegar M. 2014. Rett syndrome and MeCP2. *Neuromolecular Med* **16**:231–  
804 264. doi:10.1007/s12017-014-8295-9
- 805 Lüscher Dias T, Schuch V, Beltrão-Braga PCB, Martins-de-Souza D, Brentani HP, Franco GR,  
806 Nakaya HI. 2020. Drug repositioning for psychiatric and neurological disorders through a  
807 network medicine approach. *Transl Psychiatry* **10**:141. doi:10.1038/s41398-020-0827-5
- 808 Madore C, Leyrolle Q, Lacabanne C, Benmamar-Badel A, Joffre C, Nadjar A, Layé S. 2016.  
809 Neuroinflammation in autism: plausible role of maternal inflammation, dietary omega 3, and  
810 microbiota. *Neural Plast* **2016**:3597209. doi:10.1155/2016/3597209
- 811 Margulies M, Egholm M, Altman WE, Attiya S, Bader JS, Bemben LA, Berka J, Braverman MS,  
812 Chen Y-J, Chen Z, Dewell SB, Du L, Fierro JM, Gomes XV, Godwin BC, He W, Helgesen  
813 S, Ho CH, Irzyk GP, Jando SC, Rothberg JM. 2005. Genome sequencing in  
814 microfabricated high-density picolitre reactors. *Nature* **437**:376–380.  
815 doi:10.1038/nature03959
- 816 Marks M, Marks JL. 2016. Viral arthritis. *Clin Med* **16**:129–134. doi:10.7861/clinmedicine.16-2-  
817 129
- 818 Marrie RA, Walld R, Bolton JM, Sareen J, Walker JR, Patten SB, Singer A, Lix LM, Hitchon CA,  
819 El-Gabalawy R, Katz A, Fisk JD, Bernstein CN, CIHR Team in Defining the Burden and  
820 Managing the Effects of Psychiatric Comorbidity in Chronic Immuno-inflammatory Disease.  
821 2017. Increased incidence of psychiatric disorders in immune-mediated inflammatory  
822 disease. *J Psychosom Res* **101**:17–23. doi:10.1016/j.jpsychores.2017.07.015
- 823 Mirise RT, Kitridou RC. 1979. Arthritis and hepatitis. *West J Med* **130**:12–17.
- 824 Nalbant A, Eskier D. 2016. Genes associated with T helper 17 cell differentiation and function.  
825 *Front Biosci (Elite Ed)* **8**:427–435. doi:10.2741/e777
- 826 Newcombe EA, Camats-Perna J, Silva ML, Valmas N, Huat TJ, Medeiros R. 2018.  
827 Inflammation: the link between comorbidities, genetics, and Alzheimer's disease. *J*  
828 *Neuroinflammation* **15**:276. doi:10.1186/s12974-018-1313-3
- 829 Nygaard G, Firestein GS. 2020. Restoring synovial homeostasis in rheumatoid arthritis by  
830 targeting fibroblast-like synoviocytes. *Nat Rev Rheumatol* **16**:316–333.  
831 doi:10.1038/s41584-020-0413-5



- 832 Ozben T, Ozben S. 2019. Neuro-inflammation and anti-inflammatory treatment options for  
833 Alzheimer's disease. *Clin Biochem* **72**:87–89. doi:10.1016/j.clinbiochem.2019.04.001
- 834 Pandurangi AK, Buckley PF. 2020. Inflammation, Antipsychotic Drugs, and Evidence for  
835 Effectiveness of Anti-inflammatory Agents in Schizophrenia. *Curr Top Behav Neurosci*  
836 **44**:227–244. doi:10.1007/7854\_2019\_91
- 837 Pitt B, Sutton NR, Wang Z, Goonewardena SN, Holinstat M. 2021. Potential repurposing of the  
838 HDAC inhibitor valproic acid for patients with COVID-19. *Eur J Pharmacol* **898**:173988.  
839 doi:10.1016/j.ejphar.2021.173988
- 840 Postma DS, Kerkhof M, Boezen HM, Koppelman GH. 2011. Asthma and chronic obstructive  
841 pulmonary disease: common genes, common environments? *Am J Respir Crit Care Med*  
842 **183**:1588–1594. doi:10.1164/rccm.201011-1796PP
- 843 Rajkomar A, Oren E, Chen K, Dai AM, Hajaj N, Hardt M, Liu PJ, Liu X, Marcus J, Sun M,  
844 Sundberg P, Yee H, Zhang K, Zhang Y, Flores G, Duggan GE, Irvine J, Le Q, Litsch K,  
845 Mossin A, Dean J. 2018. Scalable and accurate deep learning with electronic health  
846 records. *npj Digital Med* **1**:18. doi:10.1038/s41746-018-0029-1
- 847 RECOVERY Collaborative Group, Horby P, Lim WS, Emberson JR, Mafham M, Bell JL, Linsell  
848 L, Staplin N, Brightling C, Ustianowski A, Elmahi E, Prudon B, Green C, Felton T, Chadwick  
849 D, Rege K, Fegan C, Chappell LC, Faust SN, Jaki T, Landray MJ. 2021. Dexamethasone in  
850 Hospitalized Patients with Covid-19. *N Engl J Med* **384**:693–704.  
851 doi:10.1056/NEJMoa2021436
- 852 Rosenblat JD, Kakar R, Berk M, Kessing LV, Vinberg M, Baune BT, Mansur RB, Brietzke E,  
853 Goldstein BI, McIntyre RS. 2016. Anti-inflammatory agents in the treatment of bipolar  
854 depression: a systematic review and meta-analysis. *Bipolar Disord* **18**:89–101.  
855 doi:10.1111/bdi.12373
- 856 Scuderi C, Verkhatsky A. 2020. The role of neuroglia in autism spectrum disorders. *Prog Mol*  
857 *Biol Transl Sci* **173**:301–330. doi:10.1016/bs.pmbts.2020.04.011
- 858 Sethi MK, Zaia J. 2017. Extracellular matrix proteomics in schizophrenia and Alzheimer's  
859 disease. *Anal Bioanal Chem* **409**:379–394. doi:10.1007/s00216-016-9900-6
- 860 Shi X, Liu Y, Zhang D, Xiao D. 2019. Valproic acid attenuates sepsis-induced myocardial  
861 dysfunction in rats by accelerating autophagy through the PTEN/AKT/mTOR pathway. *Life*  
862 *Sci* **232**:116613. doi:10.1016/j.lfs.2019.116613
- 863 Tomson T, Battino D, Perucca E. 2016. The remarkable story of valproic acid. *Lancet Neurol*  
864 **15**:141. doi:10.1016/S1474-4422(15)00398-1
- 865 Tshitoyan V, Dagdelen J, Weston L, Dunn A, Rong Z, Kononova O, Persson KA, Ceder G, Jain  
866 A. 2019. Unsupervised word embeddings capture latent knowledge from materials science  
867 literature. *Nature* **571**:95–98. doi:10.1038/s41586-019-1335-8
- 868 Tsuyuzaki K, Morota G, Ishii M, Nakazato T, Miyazaki S, Nikaido I. 2015. MeSH ORA  
869 framework: R/Bioconductor packages to support MeSH over-representation analysis. *BMC*  
870 *Bioinformatics* **16**:45. doi:10.1186/s12859-015-0453-z
- 871 Venter JC, Adams MD, Myers EW, Li PW, Mural RJ, Sutton GG, Smith HO, Yandell M, Evans

872 CA, Holt RA, Gocayne JD, Amanatides P, Ballew RM, Huson DH, Wortman JR, Zhang Q,  
873 Kodira CD, Zheng XH, Chen L, Skupski M, et al. 2001. The sequence of the human  
874 genome. *Science* **291**:1304–1351. doi:10.1126/science.1058040  
875 Wang Q, Yang C, Gelernter J, Zhao H. 2015. Pervasive pleiotropy between psychiatric  
876 disorders and immune disorders revealed by integrative analysis of multiple GWAS. *Hum*  
877 *Genet* **134**:1195–1209. doi:10.1007/s00439-015-1596-8  
878 Wickham H. 2016. ggplot2 - Elegant Graphics for Data Analysis, 2nd ed. Cham: Springer  
879 International Publishing. doi:10.1007/978-3-319-24277-4  
880 Yuan N, Chen Y, Xia Y, Dai J, Liu C. 2019. Inflammation-related biomarkers in major psychiatric  
881 disorders: a cross-disorder assessment of reproducibility and specificity in 43 meta-  
882 analyses. *Transl Psychiatry* **9**:233. doi:10.1038/s41398-019-0570-y  
883 Yu G, Wang L-G, Han Y, He Q-Y. 2012. clusterProfiler: an R package for comparing biological  
884 themes among gene clusters. *OMICS* **16**:284–287. doi:10.1089/omi.2011.0118  
885 Zambrano-Zaragoza JF, Romo-Martínez EJ, Durán-Avelar M de J, García-Magallanes N,  
886 Vibanco-Pérez N. 2014. Th17 cells in autoimmune and infectious diseases. *Int J Inflam*  
887 **2014**:651503. doi:10.1155/2014/651503  
888 Zitnik M, Nguyen F, Wang B, Leskovec J, Goldenberg A, Hoffman MM. 2019. Machine learning  
889 for integrating data in biology and medicine: principles, practice, and opportunities. *Inf*  
890 *Fusion* **50**:71–91. doi:10.1016/j.inffus.2018.09.012
